# Supplementary material for: Dexmedetomidine for the prevention of postoperative delirium in patients after intracranial operation for brain tumours (DEPOD study): a study protocol and statistical plan for a multicentre randomised controlled trial
Source: PubMed Central journal article supplement — BMJ Open. 2020 Nov 23;10(11):e040939. doi: 10.1136/bmjopen-2020-040939 (PMC7684814; doi:10.1136/bmjopen-2020-040939), 2020-11-23
Supplement: bmjopen-2020-040939.draft_revisions.pdf [file bmjopen-2020-040939.draft_revisions.pdf]

# BMJ Open

BMJ Open is committed to open peer review. As part of this commitment we make the peer review history of every article we publish publicly available.

When an article is published we post the peer reviewers' comments and the authors' responses online. We also post the versions of the paper that were used during peer review. These are the versions that the peer review comments apply to.

The versions of the paper that follow are the versions that were submitted during the peer review process. They are not the versions of record or the final published versions. They should not be cited or distributed as the published version of this manuscript.

BMJ Open is an open access journal and the full, final, typeset and author-corrected version of record of the manuscript is available on our site with no access controls, subscription charges or pay-per-view fees (<http://bmjopen.bmj.com>).

If you have any questions on BMJ Open's open peer review process please email [info.bmjopen@bmj.com](mailto:info.bmjopen@bmj.com)

# BMJ Open

## **Dexmedetomidine for the prevention of postoperative delirium in patients after intracranial operation for brain tumours (DEPOD study): a study protocol and statistical plan for a multicentre randomised controlled trial**

|                               |                                                                                                                                                                                                                                                                                                                                                                                                                                                                                                                                                                                                                                                                                                           |
|-------------------------------|-----------------------------------------------------------------------------------------------------------------------------------------------------------------------------------------------------------------------------------------------------------------------------------------------------------------------------------------------------------------------------------------------------------------------------------------------------------------------------------------------------------------------------------------------------------------------------------------------------------------------------------------------------------------------------------------------------------|
| Journal:                      | <i>BMJ Open</i>                                                                                                                                                                                                                                                                                                                                                                                                                                                                                                                                                                                                                                                                                           |
| Manuscript ID                 | bmjopen-2020-040939                                                                                                                                                                                                                                                                                                                                                                                                                                                                                                                                                                                                                                                                                       |
| Article Type:                 | Protocol                                                                                                                                                                                                                                                                                                                                                                                                                                                                                                                                                                                                                                                                                                  |
| Date Submitted by the Author: | 26-May-2020                                                                                                                                                                                                                                                                                                                                                                                                                                                                                                                                                                                                                                                                                               |
| Complete List of Authors:     | He, Xuan; Beijing Tiantan Hospital, Capital Medical University, Department of Critical Care Medicine<br>Cheng, Kun-Ming; Beijing Tiantan Hospital, Capital Medical University, Department of Critical Care Medicine<br>Zhang, Linlin; Beijing Tiantan Hospital, Capital Medical University, Department of Critical Care Medicine<br>Gu, Hongqiu; Beijing Tiantan Hospital,<br>Qu, Xin; Xuanwu Hospital, Capital Medical University, Department of Neurosurgery<br>Xu, Yuan; Beijing Tsinghua Changgung hospital, Tsinghua university, ICU<br>Ma, Penglin; Peking University Third Hospital,<br>Zhou, Jian-Xin; Beijing Tiantan Hospital, Capital Medical University, Department of Critical Care Medicine |
| Keywords:                     | Adult intensive & critical care < ANAESTHETICS, NEUROSURGERY, Delirium & cognitive disorders < PSYCHIATRY                                                                                                                                                                                                                                                                                                                                                                                                                                                                                                                                                                                                 |
|                               |                                                                                                                                                                                                                                                                                                                                                                                                                                                                                                                                                                                                                                                                                                           |

SCHOLARONE™  
Manuscripts

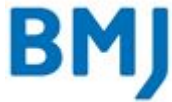

I, the Submitting Author has the right to grant and does grant on behalf of all authors of the Work (as defined in the below author licence), an exclusive licence and/or a non-exclusive licence for contributions from authors who are: i) UK Crown employees; ii) where BMJ has agreed a CC-BY licence shall apply, and/or iii) in accordance with the terms applicable for US Federal Government officers or employees acting as part of their official duties; on a worldwide, perpetual, irrevocable, royalty-free basis to BMJ Publishing Group Ltd ("BMJ") its licensees and where the relevant Journal is co-owned by BMJ to the co-owners of the Journal, to publish the Work in this journal and any other BMJ products and to exploit all rights, as set out in our [licence](#).

The Submitting Author accepts and understands that any supply made under these terms is made by BMJ to the Submitting Author unless you are acting as an employee on behalf of your employer or a postgraduate student of an affiliated institution which is paying any applicable article publishing charge ("APC") for Open Access articles. Where the Submitting Author wishes to make the Work available on an Open Access basis (and intends to pay the relevant APC), the terms of reuse of such Open Access shall be governed by a Creative Commons licence – details of these licences and which [Creative Commons](#) licence will apply to this Work are set out in our licence referred to above.

Other than as permitted in any relevant BMJ Author's Self Archiving Policies, I confirm this Work has not been accepted for publication elsewhere, is not being considered for publication elsewhere and does not duplicate material already published. I confirm all authors consent to publication of this Work and authorise the granting of this licence.

1  
2  
3  
4 **Dexmedetomidine for the prevention of postoperative delirium in patients after**  
5  
6 **intracranial operation for brain tumours (DEPOD study): a study protocol and**  
7  
8 **statistical plan for a multicentre randomised controlled trial**  
9  
10

11 Xuan He<sup>1</sup>, Kun-Ming Cheng<sup>1</sup>, Linlin Zhang<sup>1</sup>, Hong-Qiu Gu<sup>2</sup>, Qu Xin<sup>3</sup>, Yuan Xu<sup>4</sup>,  
12  
13 Peng-Lin Ma<sup>5</sup>, Jian-Xin Zhou<sup>1\*</sup>  
14  
15

16  
17 <sup>1</sup> Department of Critical Care Medicine, Beijing Tiantan Hospital, Capital Medical  
18  
19 University, Beijing, 100070, China  
20  
21

22 <sup>2</sup> China National Clinical Research Center for Neurological Diseases, Beijing Tiantan  
23  
24 Hospital, Capital Medical University, Beijing, 100070, China  
25  
26

27 <sup>3</sup> Department of Neurosurgical Critical Care, Xuanwu Hospital, Capital Medical  
28  
29 University, Beijing, 100053, China  
30  
31

32 <sup>4</sup> Department of Critical Care Medicine, Tsinghua University Affiliated Beijing  
33  
34 Tsinghua Changgung Hospital, Beijing, 102218, China  
35  
36

37 <sup>5</sup> Department of Critical Care Medicine, Peking University Third Hospital, Beijing,  
38  
39 100191, China  
40  
41

42 \* Corresponding author  
43  
44

45 Jian-Xin Zhou  
46  
47

48 Department of Critical Care Medicine, Beijing Tiantan Hospital, Capital Medical  
49  
50 University. No. 119, South 4th Ring West Road, Fengtai District, Beijing, 100070,  
51  
52  
53 China  
54

55 Telephone: +8610 59978019; Email: zhoujx.cn@icloud.com  
56  
57  
58  
59  
60

1  
2  
3  
4  
5  
6  
7  
8  
9  
10  
11  
12  
13  
14  
15  
16  
17  
18  
19  
20  
21  
22  
23  
24  
25  
26  
27  
28  
29  
30  
31  
32  
33  
34  
35  
36  
37  
38  
39  
40  
41  
42  
43  
44  
45  
46  
47  
48  
49  
50  
51  
52  
53  
54  
55  
56  
57  
58  
59  
60

Keywords: delirium, postoperative, intracranial operation, prevention,  
dexmedetomidine

Word count: 3292

For peer review only

## ABSTRACT

**Introduction** Postoperative delirium (POD) is prevalent in patients after major surgery and is associated with adverse outcomes. Several studies have reported that dexmedetomidine, a highly selective  $\alpha_2$ -adrenergic receptor agonist, can decrease the incidence of POD. However, neurosurgical patients are usually excluded from previous studies. The present study was designed to investigate the impact of prophylactic use of low-dose dexmedetomidine on the incidence of POD in patients after intracranial operation.

**Methods and analysis** This is a multicentre, randomised, double-blinded and placebo-controlled trial. Seven hundred intensive care unit admitted patients after elective intracranial operation for brain tumours under general anaesthesia are randomly assigned to the dexmedetomidine group or the placebo group with a 1:1 ratio. For patients in the dexmedetomidine group, a continuous infusion of dexmedetomidine will be started at a rate of 0.1  $\mu\text{g}/\text{kg}/\text{hour}$  immediately after enrolment on the day of operation and continued until 08:00 AM on the postoperative day one. For patients in the placebo group, normal saline will be administered at the same rate as in the dexmedetomidine group. The patients will be followed up for 28 days after enrolment. The primary endpoint is the incidence of POD, which is assessed twice daily using the Confusion Assessment Method for the Intensive Care Unit, during the first five postoperative days. The secondary endpoints include the incidence of dexmedetomidine related adverse events and non-delirium complications, the length of stay in the ICU and hospital and all-cause 28-day

1  
2  
3  
4 mortality after the operation.  
5

6 **Ethics and dissemination** The study protocol was approved by the Institutional  
7  
8  
9 Review Board of Beijing Tiantan Hospital Affiliated to Capital Medical University  
10  
11 (No KY2019-091-02) and registered at ClinicalTrials.gov. The results of the trial will  
12  
13  
14 be presented at national and international conferences relevant to subject fields and  
15  
16  
17 submitted to international peer-reviewed journals.  
18

19 **Trial registration number** NCT04399343; Pre-results.  
20  
21  
22  
23  
24  
25  
26  
27  
28  
29  
30  
31  
32  
33  
34  
35  
36  
37  
38  
39  
40  
41  
42  
43  
44  
45  
46  
47  
48  
49  
50  
51  
52  
53  
54  
55  
56  
57  
58  
59  
60

### **Main strengths and limitations of the study**

- The study design will be multicentre, randomised, double-blinded and placebo-controlled, with a relatively large sample size.
- To the best of our knowledge, this is the first study to evaluate the effect of prophylactic use of dexmedetomidine on postoperative delirium in neurosurgical patients.
- Only intensive care unit admitted patients are included, which will limit the generalizability of the results.
- Only early outcomes are assessed including the incidence of postoperative delirium and other endpoints up to 28 days after the operation.
- The hemodynamic effects of dexmedetomidine may weaken the efficiency of masking to the physicians responsible for care of the patients.



## BACKGROUND

Postoperative delirium (POD) is one of the main postoperative complications after major surgery, especially in patients admitted to the intensive care unit (ICU) [1, 2]. Studies have shown that POD is associated with adverse outcomes, including prolonged length of stay in the ICU and hospital, higher morbidity and mortality risks, increased healthcare costs, and reduced long-term quality of life [3-5]. However, patients with neurological illness are usually excluded from previous researches, and delirium is underestimated due to potential consciousness and cognition impairment [6, 7]. Recently, more attention has been devoted to POD in patients after neurosurgery [8-11]. In our cohort with 800 adult patients admitted to the ICU after elective intracranial operation under general anaesthesia, delirium was screened within three days after the surgery [8]. The incidence of POD is about 20%, which is comparable to the results in the control group of randomised controlled trials with non-neurosurgical patients (18% to 21%) [12-14]. Potential associations between POD and adverse outcomes have also been reported in neurosurgical patients [8-11]. These results indicate that early prevention of POD should be employed in this population.

Perioperative preventive medications have been an active area of clinical POD researches [15]. As a highly selective  $\alpha_2$ -adrenergic receptor agonist, dexmedetomidine has been investigated as a preventive agent for POD [12-14]. Systematic reviews and meta-analyses of randomised controlled trials have shown that perioperative administration of dexmedetomidine may decrease the incidence of

1  
2  
3  
4 POD [12], in patients after either cardiac [13] or non-cardiac surgery [14]. However,  
5  
6  
7 neurosurgical patients are often excluded in randomised controlled trials of POD [12,  
8  
9  
10 14].

11  
12 In a randomised controlled trial in patients with delayed extubation after craniotomy  
13  
14 [16], we found that early prophylactic use of dexmedetomidine during the first 24  
15  
16  
17 hours after the operation significantly reduced the incidence of agitation, which might  
18  
19  
20 include some hyperactive delirium. In this study, an infusion rate of dexmedetomidine  
21  
22  
23 was set at 0.6 µg/kg/hour, which did not produce respiratory depression but increased  
24  
25  
26 the incidence of bradycardia. In a recent randomised controlled trial in elderly patients  
27  
28  
29 after non-cardiac surgery and admitted to the ICU, prophylactic use of low-dose (0.1  
30  
31  
32 µg/kg/hour) dexmedetomidine significantly decreased the incidence of POD without  
33  
34  
35 the increased occurrence of hypotension and bradycardia [17]. A randomised  
36  
37  
38 controlled trial in critically ill adults also demonstrated that nocturnal administration  
39  
40  
41 of low-dose dexmedetomidine reduced the incidence of delirium during the ICU stay  
42  
43  
44 [18].

45  
46 The above findings encouraged us to design a multicentre randomised controlled trial,  
47  
48 DExmedetomidine for the prevention of PostOperative Delirium (DEPOD study),  
49  
50  
51 aiming to evaluate the efficacy and safety of low-dose dexmedetomidine for  
52  
53  
54 prevention of POD in patients after intracranial operation for brain tumours. The  
55  
56  
57 primary hypothesis is that, compared to the placebo group, the prophylactic use of  
58  
59  
60 low-dose dexmedetomidine can decrease the incidence of POD without significant  
adverse events in this population.

## METHODS AND ANALYSIS

### Study design

This prospective, multicentre, randomised, double-blinded and placebo-controlled trial with two parallel arms was designed to test whether the prophylactic use of low-dose dexmedetomidine would decrease the incidence of POD in adult patients admitted to the ICU after elective intracranial operation for brain tumours. The design of the present study has adhered to the Standard Protocol Items for Randomized Trials [19].

The flow chart of the trial is shown in figure 1.

### Patient and public involvement

Patients and the public are not involved in the design or conduct of the study. There is no plan to disseminate our results to study participants.

### Study locations

The study will be conducted in five ICUs in four teaching hospitals including Beijing Tiantan hospital (one general ICU and one neurosurgical ICU with a total of 50 beds) and Xuanwu hospital (one neurosurgical ICU with 30 beds) affiliated to Capital Medical University, Peking University Third Hospital (one general ICU with 30 beds), and Beijing Tsinghua Changgung Hospital affiliated to Tsinghua University (one general ICU with 20 beds), in Beijing, China.

## Participants

Potential eligible participants are screened on admission to the ICU.

The inclusion criteria are adult patients after elective intracranial operation for brain tumours under general anaesthesia and who are admitted to the ICU directly from the operating room or postoperative care unit.

The exclusion criteria include:

1. Age younger than 18 years;
2. Admitted to the ICU after 22:00 PM;
3. Medical records documented preoperative history of mental or cognitive disorders including schizophrenia, epilepsy, Parkinsonism, or dementia;
4. Medical records documented inability to communicate in the preoperative period due to coma or language barrier;
5. History of drug abuse of psychoactive and anaesthetic drugs;
6. Known preoperative severe bradycardia (lower than 50 beats/min), sick sinus syndrome, second- or third-degree atrioventricular block, or left ventricular ejection fraction lower than 30%;
7. Serious hepatic dysfunction (Child-Pugh class C);
8. Severe renal dysfunction requiring renal replacement therapy before the surgery;
9. Allergies to ingredients or components of 5-[(1S)-1-(2,3-dimethylphenyl)ethyl]-1H-imidazole (dexmedetomidine hydrochloride);
10. American Society of Anesthesiologists (ASA) classification of IV to VI;
11. Moribund condition with a low likelihood of survival for more than 24 hours;

- 1
- 2
- 3
- 4 12. Pregnancy or lactation women;
- 5
- 6 13. Current enrolment in another clinical trial;
- 7
- 8
- 9 14. Refusal to participate.
- 10

11 Once the patient's eligibility is confirmed, a 24-hour on-call study coordinator will be  
12 contacted. Each relevant aspect of the project will be described and written informed  
13 consent will be obtained from the patient. If the patient cannot provide consent,  
14 written informed consent will be obtained from their authorized representatives. The  
15 study coordinator will be particularly careful to assure the patients or their authorized  
16 representatives that they are free to decline consent without consequences, and that  
17 they can withdraw consent at any time without an impact on treatment.  
18  
19  
20  
21  
22  
23  
24  
25  
26  
27  
28  
29  
30  
31

### 32 **Randomisation, allocation concealment and blinding**

33 After obtaining informed consent, the enrolled patients are randomly allocated to  
34 receive a continuous intravenous infusion of dexmedetomidine or placebo (normal  
35 saline).  
36  
37  
38  
39  
40  
41

42 To ensure allocation concealment of the randomisation, a password-protected central  
43 randomisation system is established and applied. A biostatistician who will not  
44 participate in data management and statistical analysis generates random numbers in a  
45 1:1 ratio using the SAS 9.2 software (SAS Institute, Cary, NC). The stratification is  
46 performed among the five participating ICUs with prespecified block sizes depending  
47 on the anticipated number of recruitments. The random allocation sequence remains  
48 concealed from investigators in charge of enrolment. When the patient's enrolment is  
49  
50  
51  
52  
53  
54  
55  
56  
57  
58  
59  
60

1  
2  
3  
4 confirmed, the investigator will log in to the central randomisation system, complete  
5  
6 the checklist of inclusion and exclusion criteria, and acquire the random number. A  
7  
8 pharmacist in each centre who has no knowledge of patients before the randomisation  
9  
10 and will not participate in the rest of the study provides the study agents according to  
11  
12 the randomisation results.  
13  
14

15  
16 The experimental agents (dexmedetomidine hydrochloride 200 µg/2 ml or normal  
17  
18 saline 2 ml) are manufactured and provided by the Jiangsu Nhwa Pharmaceutical Co.,  
19  
20 Ltd (Jiangsu, China). The agents are packed as clear aqueous solutions with the same  
21  
22 character in the same 3-ml ampoules.  
23  
24

25  
26 Information on randomisation and group allocation will be blinded from the patients,  
27  
28 the investigators who perform data collection and follow-up, the ICU physicians and  
29  
30 other healthcare providers who are responsible for patients care. Blinding will be  
31  
32 maintained throughout the entire research period.  
33  
34

35  
36 During the study, group allocation can be unmasked in order to protect the patient's  
37  
38 safety. Investigators can request an urgent unmasking to the central randomisation  
39  
40 system if considered necessary in case of the occurrence of severe adverse events or  
41  
42 any unexpected deterioration of the patient's condition. Because each ampoule  
43  
44 containing an experimental drug or placebo has a unique randomisation number, this  
45  
46 emergency unmasking will not reveal the group allocations in other enrolled patients.  
47  
48  
49 The unmasked patients will be included in the intention-to-treat analysis.  
50  
51  
52  
53  
54  
55

#### 56 57 58 **Data collected at study entry** 59 60

1  
2  
3  
4 At baseline, demographic data, history of past illnesses and diagnosis of the patients  
5  
6 are obtained. The surgical site and approach, body position, malignant tumour,  
7  
8 intraoperative medications, fluid balance during operation, the amount of bleeding  
9  
10 and blood transfusion during operation, episode of hypoxemia and hypotension during  
11  
12 operation and duration of operation are recorded. The presence of an endotracheal  
13  
14 tube and the need for mechanical ventilation on ICU admission are documented. The  
15  
16 Acute Physiology and Chronic Health Evaluation II score (APACHE II) and Glasgow  
17  
18 Coma Scale (GCS) are calculated. The time interval between the end of operation and  
19  
20 study drug infusion is recorded.  
21  
22  
23  
24  
25

26  
27 Before the start of study agent infusion, delirium is evaluated using the Confusion  
28  
29 Assessment Method for the ICU (CAM-ICU) [20-22] and documented as emergence  
30  
31 delirium.  
32  
33  
34  
35  
36

### 37 **Trial interventions and management of pain, agitation and delirium**

38  
39 All enrolled patients will be randomly allocated to receive a continuous intravenous  
40  
41 infusion of dexmedetomidine hydrochloride (dexmedetomidine group) or normal  
42  
43 saline (placebo group).  
44  
45  
46

47  
48 The study agent (dexmedetomidine hydrochloride 200 µg/2 ml or normal saline 2 ml)  
49  
50 is diluted with normal saline to 50 ml and continuously infused at a rate of 0.025  
51  
52 ml/kg/hour. This represents an infusion rate of 0.1 µg/kg/hour dexmedetomidine  
53  
54 hydrochloride in the dexmedetomidine group.  
55  
56

57  
58 The intravenous infusion will be started immediately after enrolment and continued  
59  
60

1  
2  
3  
4 until 08:00 AM on the postoperative day one. During the study, scopolamine and  
5  
6 penehyclidine will not be given. Open-labelled dexmedetomidine will be prohibited.  
7  
8  
9 Atropine can only be applied to treat bradycardia.

10  
11 Routine clinical managements of pain, agitation and delirium have been established  
12  
13 according to the recommendations in guidelines proposed by the American Society of  
14  
15 Critical Care Medicine [23] and the European Society of Anaesthesiology [1] in all  
16  
17 participating ICUs [8, 16, 24-26]. During the study protocol group discussion and  
18  
19 training, several key elements in comprehensive approaches to reduce POD have been  
20  
21 highlighted and emphasized as following:  
22  
23  
24  
25

- 26  
27 1. Regular pain assessment is performed using patient's self-reported scales such as  
28  
29 the Numeric Rating Scale (NRS) and the Visual Analogue Scale (VAS), and if  
30  
31 impossible, using behavioural pain scales such as the Behavioral Pain Scale  
32  
33 (BPS) and the Critical-Care Pain Observation Tool (CPOT);  
34  
35
- 36  
37 2. Opioids or nonsteroidal anti-inflammatory drugs should be used in patients who  
38  
39 require analgesia;  
40  
41
- 42  
43 3. Regular agitation-sedation assessment is performed using the Richmond  
44  
45 Agitation-Sedation Scale (RASS) or the Sedation-Agitation Scale (SAS);  
46  
47
- 48  
49 4. If the patients exhibit agitation, sedation should be initiated using common  
50  
51 sedatives including propofol and midazolam. Although midazolam is available, it  
52  
53 is not recommended as the priority of sedative drugs;  
54  
55
- 56  
57 5. A light sedation depth is recommended to maintain a RASS score of -2 to +1 or a  
58  
59 SAS score of 3 to 5.  
60



- 1  
2  
3  
4 6. In conjunction with the recent clinical guidelines for ICU delirium [27], we  
5  
6 recommend that repeated reorientation, cognitive stimulation, early mobilization,  
7  
8 sleep-promotion strategies, and hearing or vision aids should be performed as  
9  
10 long as possible;  
11  
12
- 13  
14 7. Patients who develop POD are first given non-pharmacological treatments listed  
15  
16 above. Pharmacological treatment is only reserved for patients with hyperactive  
17  
18 delirium with disorientated agitation. Haloperidol (0.5 to 2 mg) can be  
19  
20 intravenously injected followed by the administration of half of the loading dose  
21  
22 for every 4 to 6 hours until the control of the severe hyperactive delirium.  
23  
24  
25

26  
27 The routine patient management and ICU discharge will be decided by the  
28  
29 responsible ICU physicians. The hospital discharge will be decided by the responsible  
30  
31 neurosurgeons.  
32  
33

### 34 35 36 37 **Adverse events management**

38  
39 Adverse events will be monitored from the start of study agent infusion until 24 hours  
40  
41 or until ICU discharge. Investigators should record all the adverse events including  
42  
43 the type, diagnosis time, duration and consequences. Predicted adverse events in the  
44  
45 present study include bradycardia (defined as heart rate lower than 50 beats/min),  
46  
47 hypotension (defined as systolic blood pressure lower than 90 mmHg), and  
48  
49 hypoxemia (defined as pulse oxygen saturation lower than 90%) [16, 17].  
50  
51  
52

53  
54  
55 Attending ICU physicians can stop the study agent infusion in the following cases:

- 56  
57  
58 1. Heart rate lower than 40 beats/min after atropine in 0.25 mg intravenous bolus;  
59  
60

2. Systolic blood pressure lower than 90 mmHg after fluid resuscitation with 250 ml crystalloid solution infusion within 15 min;
3. Peripheral pulse oxygen saturation lower than 90% after administration of oxygen and adjustment of mechanical ventilation for patients without and with endotracheal intubation, respectively;
4. Other conditions deemed necessary by the ICU physician.

In these cases, the reasons that lead to any protocol interruption are documented and reported to the Institutional Review Board of Beijing Tiantan Hospital Affiliated to Capital Medical University within 24 hours. Patients with study protocol interruption will be included in the intention-to-treat analysis.

### **Outcome measurements**

The patients will be followed up twice daily during the first five postoperative days, and then weekly until hospital discharge or until 28 days after the operation.

Investigators who are responsible for follow-up will not involve in the study agent infusion and patient care, and they are not allowed to exchange patient's information with ICU physicians taking care of the patients.

The primary endpoint is the incidence of POD during the first five postoperative days [1]. Delirium is evaluated twice daily (08:00 AM to 10:00 AM and 18:00 PM to 20:00 PM) until the fifth postoperative day by the CAM-ICU [20-22]. Before the initiation of the trial, investigators in each participating ICU are trained to follow the study protocol and to perform the CAM-ICU evaluation. Thereafter, the training will be

1  
2  
3  
4 performed at an interval of 3 months during the study. An expert from the Department  
5  
6 of Psychiatry is invited to provide the training. The training courses consist of three  
7  
8 phases: (1) group training with information about delirium, RASS and CAM-ICU, as  
9  
10 well as a video demonstrating the detailed conduction of CAM-ICU assessment; (2)  
11  
12 one-to-one instruction at the bedside; (3) examination on five patients who have been  
13  
14 pre-assessed by the expert. Different results of delirium assessment between the  
15  
16 trainee and the expert will be discussed until 100% agreement is reached.  
17  
18  
19  
20  
21

22 Secondary endpoints include:

- 23  
24 1. Incidence of adverse events from the start of study agent infusion until 24 hours  
25  
26 or until ICU discharge;
- 27  
28 2. Incidence of non-delirium complications after the operation until 28 days,  
29  
30 including airway obstruction and apnoea, respiratory failure, cardiac events,  
31  
32 coma, epilepsy, cerebral haemorrhage or infarction, renal injury and infection;  
33  
34
- 35  
36 3. Length of stay in the ICU and hospital after the operation;
- 37  
38 4. All-cause 28-day mortality after the operation.  
39  
40  
41  
42

43 Additional pre-specified endpoints include the use of sedatives and analgesics during  
44  
45 the study agent infusion, pain intensity (assessed by CPOT) [23, 27] and subjective  
46  
47 sleep quality (assessed by NRS) [28] in the morning of postoperative day one.  
48  
49  
50  
51  
52

### 53 **Data management and monitoring**

54  
55 Before the initiation of the study, an electronic case report form (eCRF) is established  
56  
57 and available online at a dedicated website with password-protected access for each  
58  
59  
60

1  
2  
3  
4 participating centre. Each enrolled patient will be assigned an identification number.

5  
6 Patient data will be coded and kept confidential. Related paper records will be stored  
7  
8  
9 in a locked cabinet in an access-controlled room.

10  
11 Each participating centre will indicate a local coordinator in charge of the study. The  
12  
13  
14 local coordinators guarantee the integrity of data collection and timely completion of  
15  
16  
17 the eCRF.

18  
19 Data quality and safety will be monitored by an independent Data and Safety  
20  
21  
22 Monitoring Board, which will be composed of five multidisciplinary experts who are  
23  
24  
25 not have subordinate relationships with any members of the research team. Data  
26  
27  
28 management and statistical analysis will be performed by the China National Clinical  
29  
30  
31 Research Center for Neurological Diseases in Beijing Tiantan Hospital. Because  
32  
33  
34 dexmedetomidine has been widely used in the ICU and its safety has been confirmed  
35  
36  
37 in the previous studies [16, 17], an interim analysis will not be scheduled. Severe  
38  
39  
40 adverse events will be reported to the Institutional Review Board of Beijing Tiantan  
41  
42  
43 Hospital Affiliated to Capital Medical University within 24 hours.

#### 44 45 **Current sample size justification**

46  
47  
48 In four observational studies, including 2769 patients after intracranial operation,  
49  
50  
51 POD occurred in 349 patients with an overall pooled crude incidence of 13% [8-11].

52  
53  
54 A recent meta-analysis of non-cardiac patients showed that the incidence of POD  
55  
56  
57 reduced by approximately half when dexmedetomidine was used perioperatively [14].

58  
59  
60 We assume that the incidence of POD would be reduced by half in the

1  
2  
3  
4 dexmedetomidine group compared with the placebo group in the present study. With  
5  
6 a significance and power set at 0.05 (two-sided) and 80%, respectively, the sample  
7  
8 size required to detect difference is 648 patients. Taking into account about 6% of the  
9  
10 loss to follow-up rate, 700 (350 in each group) patients need to be enrolled.  
11  
12  
13  
14  
15  
16

### 17 **Statistical analysis**

18  
19 All analyses will be conducted according to the intention-to-treat principle, that is, all  
20  
21 randomised patients will be analysed in the groups to which they have been originally  
22  
23 allocated and will be blinded to treatment assignment.  
24  
25

26  
27 Categorical variables will be presented as numbers and percentages, and analysed by  
28  
29 the  $\chi^2$ -test. Continuous variables will be checked for normal distribution and  
30  
31 presented as mean and standard deviation or median and interquartile range as  
32  
33 appropriate. Comparison of continuous variables will be performed by Student's t-test  
34  
35 for normally distributed variables and the Mann-Whitney U test for non-normally  
36  
37 distributed variables. Time-to-event variables will be analysed by survival analysis,  
38  
39 with the difference between groups assessed with Log-Rank test.  
40  
41  
42  
43  
44

45 Statistical analysis will be performed using SPSS 20.0 (SPSS Inc., Chicago, IL, USA)  
46  
47 and SAS 9.2 software (SAS Institute, Cary, NC). A *p*-value of less than 0.05 is  
48  
49 considered statistically significant.  
50  
51  
52  
53  
54  
55  
56  
57  
58  
59  
60

## SUMMARY

This multicentre, randomised, placebo-controlled, double-blinded trial is designed to investigate the effect of prophylactic use of low-dose dexmedetomidine on the incidence of POD in adult patients admitted to the ICU after intracranial operation for brain tumours.

In the present study, the CAM-ICU is used for the POD diagnosis. The CAM-ICU has been validated in mechanically ventilated patients [20] and non-intubated ICU patients [21]. The Chinese version of the CAM-ICU has been validated in the ICU setting in mainland China [22], and the feasibility has been established in studies reported by our group and others [8, 17]. We will conduct the screening of delirium twice daily from postoperative day one to day five, which is in accordance with the recommendation provided by the European Society of Anaesthesiology evidence-based and consensus-based guideline on POD [1]. The first POD assessment is performed in the morning on postoperative day one, which will be around 24 hours after the operation. This timing of the first assessment is selected to avoid the bias resulting from the diagnosis of emergence delirium, which may be only related to the influence of hypnotics [5, 29]. Furthermore, investigators in each participating ICU who are in charge of postoperative follow-up are trained by a psychiatrist before the initiation of the study to guarantee the quality of the CAM-ICU evaluation.

We design a low-dose dexmedetomidine infusion (0.1 µg/kg/hour) in the present study to avoid drug-related hemodynamic adverse events such as severe bradycardia demonstrated in our previous study [16]. The efficacy and safety of this

1  
2  
3  
4 dexmedetomidine dosing regimen have been validated in previous studies in elderly  
5  
6  
7 patients after non-cardiac surgery [30].  
8

9  
10 The main strength of the present study is the design of a multicentre, randomised,  
11  
12 placebo-controlled and double-blinded trial with a relatively large sample size. To the  
13  
14 best of our knowledge, this is the first study to evaluate the impact of pharmacological  
15  
16 interventions on POD in neurosurgical patients admitted to ICU. The results of the  
17  
18 study will provide high-quality evidence. There are also several limitations to our  
19  
20 study. First, we will only enrol patients admitted to the ICU, which may represent a  
21  
22 population at high risk of POD [3-5]. Thus, our results may be limited for  
23  
24 generalizing to the entire population of patients undergoing intracranial surgery.  
25  
26  
27  
28  
29 Second, we only evaluate early outcomes up to 28 days after the operation. Third, the  
30  
31 hemodynamic effects of dexmedetomidine such as bradycardia might weaken the  
32  
33 efficiency of masking to the treating physicians in the ICU. However, investigators  
34  
35 who are responsible for follow-up will not involve in the study agent infusion and  
36  
37 patient care. Additionally, the exchange of patient's information is not allowed  
38  
39  
40  
41  
42 between investigators in charge of follow-up and ICU physicians taking care of the  
43  
44 patients. This will decrease the risk of unmasking to the greatest extent.  
45  
46  
47  
48  
49

## 50 **Trial status**

51  
52  
53 At the time of manuscript submission, the study is in the preparation phase for  
54  
55  
56 recruitment.  
57  
58  
59  
60

## REFERENCES

1. Aldecoa C, Bettelli G, Bilotta F, *et al.* European Society of Anaesthesiology evidence-based and consensus-based guideline on postoperative delirium. *Eur J Anaesthesiol* 2017;34:192-214.
2. Mahanna-Gabrielli E, Schenning KJ, Eriksson LI, *et al.* State of the clinical science of perioperative brain health: report from the American Society of Anesthesiologists Brain Health Initiative Summit 2018. *Br J Anaesth* 2019;123:464-78.
3. Whitlock EL, Vannucci A, Avidan MS. Postoperative delirium. *Minerva Anesthesiol* 2011;77:448-56.
4. Inouye SK, Westendorp RG, Saczynski JS. Delirium in elderly people. *Lancet* 2014;383(9920):911-22.
5. Olotu C. Postoperative neurocognitive disorders. *Curr Opin Anaesthesiol* 2020;33:101-08.
6. Teitelbaum JS, Ayoub O, Skrobik Y. A critical appraisal of sedation, analgesia and delirium in neurocritical care. *Can J Neurol Sci* 2011;38:815-25.
7. Yu A, Teitelbaum J, Scott J, *et al.* Evaluating pain, sedation, and delirium in the neurologically critically ill-feasibility and reliability of standardized tools: a multi-institutional study. *Crit Care Med* 2013;41:2002-7.
8. Wang CM, Huang HW, Wang YM, *et al.* Incidence and risk factors of postoperative delirium in patients admitted to the ICU after elective intracranial surgery: A prospective cohort study. *Eur J Anaesthesiol* 2020;37:14-24.



- 1  
2  
3  
4 9. Hong Chen MN, Jiang H, Chen B, *et al.* The incidence and predictors of  
5  
6 postoperative delirium (POD) after brain tumor resection in adults: A cross-  
7  
8 sectional survey. *World Neurosurg* 2020 May 3; Online ahead of print.  
9  
10
- 11  
12 10. Budenas A, Tamasauskas S, Sliuzys A, *et al.* Incidence and clinical significance  
13  
14 of postoperative delirium after brain tumor surgery. *Acta Neurochir (Wien)*  
15  
16 2018;160:2327-37.  
17  
18
- 19  
20 11. Flanigan PM, Jahangiri A, Weinstein D, *et al.* Postoperative Delirium in  
21  
22 Glioblastoma Patients: Risk Factors and Prognostic Implications. *Neurosurgery*  
23  
24 2018;83:1161-72.  
25  
26
- 27  
28 12. Duan X, Coburn M, Rossaint R, *et al.* Efficacy of perioperative dexmedetomidine  
29  
30 on postoperative delirium: systematic review and meta-analysis with trial  
31  
32 sequential analysis of randomised controlled trials. *Br J Anaesth* 2018;121:384-  
33  
34 97.  
35  
36
- 37  
38 13. Wu M, Liang Y, Dai Z, *et al.* Perioperative dexmedetomidine reduces delirium  
39  
40 after cardiac surgery: A meta-analysis of randomized controlled trials. *J Clin*  
41  
42 *Anesth* 2018;50:33-42.  
43  
44
- 45  
46 14. Zeng H, Li Z, He J, *et al.* Dexmedetomidine for the prevention of postoperative  
47  
48 delirium in elderly patients undergoing noncardiac surgery: A meta-analysis of  
49  
50 randomized controlled trials. *PLoS One* 2019;14:e0218088.  
51  
52
- 53  
54 15. Magoon R, Kumar AK, Malik V, *et al.* Dexmedetomidine and postoperative  
55  
56 delirium: Decoding the evidence! *J Anaesthesiol Clin Pharmacol* 2020;36:140-  
57  
58 41.  
59  
60

- 1  
2  
3  
4 16. Zhao LH, Shi ZH, Chen GQ, *et al.* Use of Dexmedetomidine for Prophylactic  
5  
6 Analgesia and Sedation in Patients With Delayed Extubation After Craniotomy:  
7  
8 A Randomized Controlled Trial. *J Neurosurg Anesthesiol* 2017;29:132-39.  
9  
10
- 11  
12 17. Su X, Meng ZT, Wu XH, *et al.* Dexmedetomidine for prevention of delirium in  
13  
14 elderly patients after non-cardiac surgery: a randomised, double-blind, placebo-  
15  
16 controlled trial. *Lancet* 2016;388(10054):1893-902.  
17  
18
- 19  
20 18. Skrobik Y, Duprey MS, Hill NS, *et al.* Low-Dose Nocturnal Dexmedetomidine  
21  
22 Prevents ICU Delirium. A Randomized, Placebo-controlled Trial. *Am J Respir*  
23  
24 *Crit Care Med* 2018;197:1147-56.  
25  
26
- 27  
28 19. Chan AW, Tetzlaff JM, Altman DG, *et al.* SPIRIT 2013 statement: defining  
29  
30 standard protocol items for clinical trials. *Ann Intern Med* 2013;158:200-7.  
31  
32
- 33  
34 20. Ely EW, Inouye SK, Bernard GR, *et al.* Delirium in mechanically ventilated  
35  
36 patients: validity and reliability of the confusion assessment method for the  
37  
38 intensive care unit (CAM-ICU). *JAMA* 2001;286:2703-10.  
39  
40
- 41  
42 21. Ely EW, Margolin R, Francis J, *et al.* Evaluation of delirium in critically ill  
43  
44 patients: validation of the Confusion Assessment Method for the Intensive Care  
45  
46 Unit (CAM-ICU). *Crit Care Med* 2001;29:1370-9.  
47  
48
- 49  
50 22. Wang C, Wu Y, Yue P, *et al.* Delirium assessment using Confusion Assessment  
51  
52 Method for the Intensive Care Unit in Chinese critically ill patients. *J Crit Care*  
53  
54 2013;28:223-9.  
55  
56
- 57  
58 23. Barr J, Fraser GL, Puntillo K, *et al.* Clinical practice guidelines for the  
59  
60 management of pain, agitation, and delirium in adult patients in the intensive care

- 1  
2  
3  
4 unit. *Crit Care Med* 2013;41:263-306.  
5  
6  
7 24. Wu YX, Chen H, Li Q, *et al.* The Prophylactic Use of Remifentanyl for Delayed  
8  
9 Extubation After Elective Intracranial Operations: a Prospective, Randomized,  
10  
11 Double-Blinded Trial. *J Neurosurg Anesthesiol* 2017;29:281-90.  
12  
13  
14 25. Huang HW, Yan LM, Yang YL, *et al.* Bi-frontal pneumocephalus is an  
15  
16 independent risk factor for early postoperative agitation in adult patients admitted  
17  
18 to intensive care unit after elective craniotomy for brain tumor: A prospective  
19  
20 cohort study. *PLoS One* 2018;13:e0201064.  
21  
22  
23  
24 26. Shan K, Cao W, Yuan Y, *et al.* Use of the critical-care pain observation tool and  
25  
26 the bispectral index for the detection of pain in brain-injured patients undergoing  
27  
28 mechanical ventilation: A STROBE-compliant observational study. *Medicine*  
29  
30 *(Baltimore)* 2018;97:e10985.  
31  
32  
33  
34 27. Devlin JW, Skrobik Y, Gelinas C, *et al.* Clinical Practice Guidelines for the  
35  
36 Prevention and Management of Pain, Agitation/Sedation, Delirium, Immobility,  
37  
38 and Sleep Disruption in Adult Patients in the ICU. *Crit Care Med* 2018;46:e825-  
39  
40 e73.  
41  
42  
43  
44 28. Ritmala-Castren M, Lakanmaa RL, Virtanen I, *et al.* Evaluating adult patients'  
45  
46 sleep: an integrative literature review in critical care. *Scand J Caring Sci*  
47  
48 2014;28:435-48.  
49  
50  
51  
52 29. Munk L, Andersen G, Moller AM. Post-anaesthetic emergence delirium in adults:  
53  
54 incidence, predictors and consequences. *Acta Anaesthesiol Scand* 2016;60:1059-  
55  
56 66.  
57  
58  
59  
60

- 1  
2  
3  
4 30. Shen QH, Li HF, Zhou XY, *et al.* Dexmedetomidine in the prevention of  
5  
6 postoperative delirium in elderly patients following non-cardiac surgery: A  
7  
8 systematic review and meta-analysis. *Clin Exp Pharmacol Physiol* 2020 Mar 25;  
9  
10  
11 Online ahead of print.  
12  
13  
14  
15  
16  
17  
18  
19  
20  
21  
22  
23  
24  
25  
26  
27  
28  
29  
30  
31  
32  
33  
34  
35  
36  
37  
38  
39  
40  
41  
42  
43  
44  
45  
46  
47  
48  
49  
50  
51  
52  
53  
54  
55  
56  
57  
58  
59  
60

For peer review only

## Contributors

J-XZ planned the study. H-QG performed the statistical design of the study. All authors contributed to the design and development of the trial (XH, K-MC, LZ, H-QG, XQ, YX, P-LM and J-XZ). XH and J-XZ drafted the manuscript. LZ critically revised the manuscript. All authors read and approved the final manuscript.

## Funding

The study was supported by a grant from the Chinese Stroke Association (CSA2019KY005). The sponsors have no role in the study design and conduct; the data collection, management, analysis and interpretation; or the preparation and approval of the manuscript.

## Competing interests

The experimental agents (dexmedetomidine hydrochloride and normal saline) are manufactured, packed and provided by the Jiangsu Nhwa Pharmaceutical Co., Ltd (Jiangsu, China). Agents provider has no role in the study design and conduct; the data collection, management, analysis and interpretation; or the preparation and approval of the manuscript.

The authors declare that they have no other competing interests.

## Patient consent

Obtained.

## Ethics approval

The study protocol (V2.0/2019-10-10 issue date October 2019) was approved by the Institutional Review Board of Beijing Tiantan Hospital Affiliated to Capital Medical

1  
2  
3  
4 University (No KY2019-091-02). The trial was registered at ClinicalTrials.gov with  
5  
6 identifier NCT04399343 on May 21, 2020.  
7  
8  
9  
10  
11  
12  
13  
14  
15  
16  
17  
18  
19  
20  
21  
22  
23  
24  
25  
26  
27  
28  
29  
30  
31  
32  
33  
34  
35  
36  
37  
38  
39  
40  
41  
42  
43  
44  
45  
46  
47  
48  
49  
50  
51  
52  
53  
54  
55  
56  
57  
58  
59  
60

For peer review only

1  
2  
3  
4  
5  
6  
7  
8  
9  
10  
11  
12  
13  
14  
15  
16  
17  
18  
19  
20  
21  
22  
23  
24  
25  
26  
27  
28  
29  
30  
31  
32  
33  
34  
35  
36  
37  
38  
39  
40  
41  
42  
43  
44  
45  
46  
47  
48  
49  
50  
51  
52  
53  
54  
55  
56  
57  
58  
59  
60

**Figure legend**

Figure 1 Flow chart of the trial

For peer review only

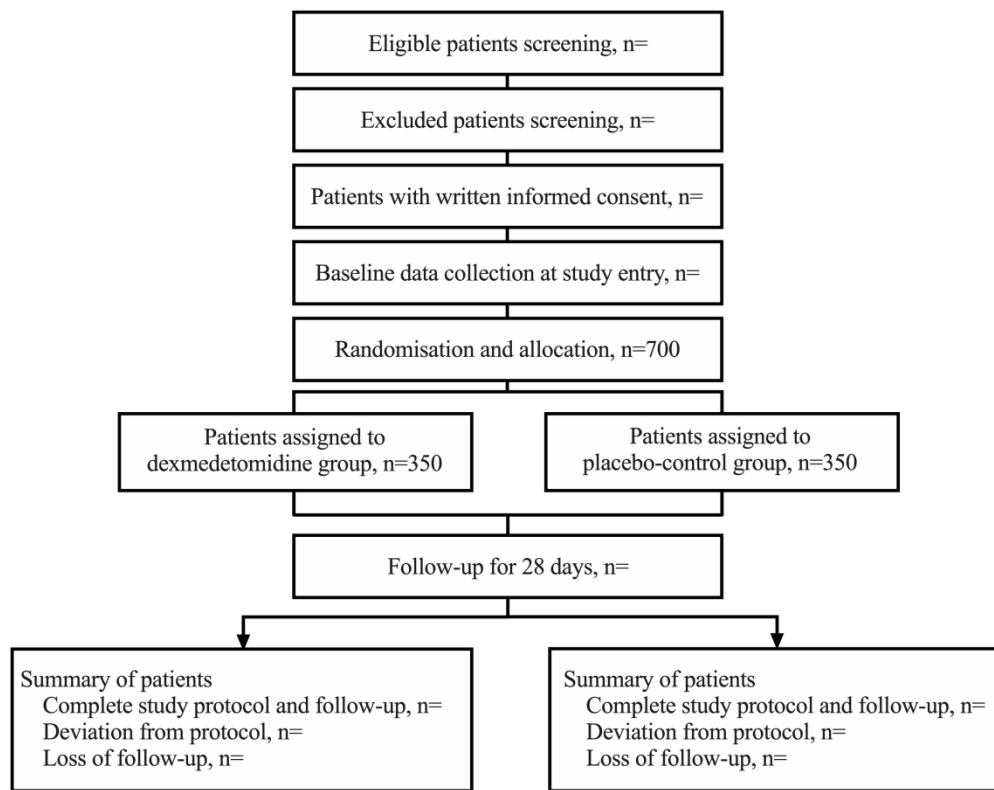

Figure 1 Flow chart of the trial

238x186mm (300 x 300 DPI)



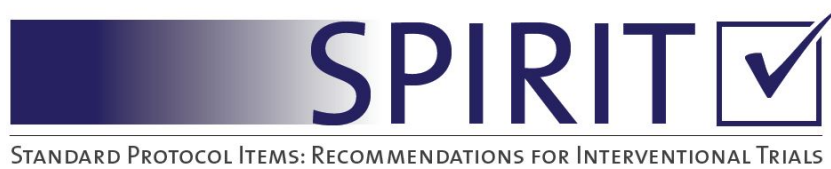

SPIRIT 2013 Checklist: Recommended items to address in a clinical trial protocol and related documents\*

| Section/item                      | Item No | Description                                                                                                                                                                                                                                                                              |
|-----------------------------------|---------|------------------------------------------------------------------------------------------------------------------------------------------------------------------------------------------------------------------------------------------------------------------------------------------|
| <b>Administrative information</b> |         |                                                                                                                                                                                                                                                                                          |
| Title                             | 1✓      | Descriptive title identifying the study design, population, interventions, and, if applicable, trial acronym                                                                                                                                                                             |
| Trial registration                | 2a✓     | Trial identifier and registry name. If not yet registered, name of intended registry                                                                                                                                                                                                     |
|                                   | 2b      | All items from the World Health Organization Trial Registration Data Set                                                                                                                                                                                                                 |
| Protocol version                  | 3✓      | Date and version identifier                                                                                                                                                                                                                                                              |
| Funding                           | 4✓      | Sources and types of financial, material, and other support                                                                                                                                                                                                                              |
| Roles and responsibilities        | 5a✓     | Names, affiliations, and roles of protocol contributors                                                                                                                                                                                                                                  |
|                                   | 5b✓     | Name and contact information for the trial sponsor                                                                                                                                                                                                                                       |
|                                   | 5c✓     | Role of study sponsor and funders, if any, in study design; collection, management, analysis, and interpretation of data; writing of the report; and the decision to submit the report for publication, including whether they will have ultimate authority over any of these activities |
|                                   | 5d✓     | Composition, roles, and responsibilities of the coordinating centre, steering committee, endpoint adjudication committee, data management team, and other individuals or groups overseeing the trial, if applicable (see Item 21a for data monitoring committee)                         |
| <b>Introduction</b>               |         |                                                                                                                                                                                                                                                                                          |
| Background and rationale          | 6a✓     | Description of research question and justification for undertaking the trial, including summary of relevant studies (published and unpublished) examining benefits and harms for each intervention                                                                                       |
|                                   | 6b✓     | Explanation for choice of comparators                                                                                                                                                                                                                                                    |
| Objectives                        | 7✓      | Specific objectives or hypotheses                                                                                                                                                                                                                                                        |
| Trial design                      | 8✓      | Description of trial design including type of trial (eg, parallel group, crossover, factorial, single group), allocation ratio, and framework (eg, superiority, equivalence, noninferiority, exploratory)                                                                                |

## Methods: Participants, interventions, and outcomes

|                      |      |                                                                                                                                                                                                                                                                                                                                                                                |
|----------------------|------|--------------------------------------------------------------------------------------------------------------------------------------------------------------------------------------------------------------------------------------------------------------------------------------------------------------------------------------------------------------------------------|
| Study setting        | 9✓   | Description of study settings (eg, community clinic, academic hospital) and list of countries where data will be collected. Reference to where list of study sites can be obtained                                                                                                                                                                                             |
| Eligibility criteria | 10✓  | Inclusion and exclusion criteria for participants. If applicable, eligibility criteria for study centres and individuals who will perform the interventions (eg, surgeons, psychotherapists)                                                                                                                                                                                   |
| Interventions        | 11a✓ | Interventions for each group with sufficient detail to allow replication, including how and when they will be administered                                                                                                                                                                                                                                                     |
|                      | 11b✓ | Criteria for discontinuing or modifying allocated interventions for a given trial participant (eg, drug dose change in response to harms, participant request, or improving/worsening disease)                                                                                                                                                                                 |
|                      | 11c✓ | Strategies to improve adherence to intervention protocols, and any procedures for monitoring adherence (eg, drug tablet return, laboratory tests)                                                                                                                                                                                                                              |
|                      | 11d✓ | Relevant concomitant care and interventions that are permitted or prohibited during the trial                                                                                                                                                                                                                                                                                  |
| Outcomes             | 12✓  | Primary, secondary, and other outcomes, including the specific measurement variable (eg, systolic blood pressure), analysis metric (eg, change from baseline, final value, time to event), method of aggregation (eg, median, proportion), and time point for each outcome. Explanation of the clinical relevance of chosen efficacy and harm outcomes is strongly recommended |
| Participant timeline | 13✓  | Time schedule of enrolment, interventions (including any run-ins and washouts), assessments, and visits for participants. A schematic diagram is highly recommended (see Figure)                                                                                                                                                                                               |
| Sample size          | 14✓  | Estimated number of participants needed to achieve study objectives and how it was determined, including clinical and statistical assumptions supporting any sample size calculations                                                                                                                                                                                          |
| Recruitment          | 15✓  | Strategies for achieving adequate participant enrolment to reach target sample size                                                                                                                                                                                                                                                                                            |

## Methods: Assignment of interventions (for controlled trials)

### Allocation:

|                     |      |                                                                                                                                                                                                                                                                                                                                                          |
|---------------------|------|----------------------------------------------------------------------------------------------------------------------------------------------------------------------------------------------------------------------------------------------------------------------------------------------------------------------------------------------------------|
| Sequence generation | 16a✓ | Method of generating the allocation sequence (eg, computer-generated random numbers), and list of any factors for stratification. To reduce predictability of a random sequence, details of any planned restriction (eg, blocking) should be provided in a separate document that is unavailable to those who enrol participants or assign interventions |
|---------------------|------|----------------------------------------------------------------------------------------------------------------------------------------------------------------------------------------------------------------------------------------------------------------------------------------------------------------------------------------------------------|

|    |                |      |                                                                         |
|----|----------------|------|-------------------------------------------------------------------------|
| 1  |                |      |                                                                         |
| 2  | Allocation     | 16b✓ | Mechanism of implementing the allocation sequence (eg, central          |
| 3  | concealment    |      | telephone; sequentially numbered, opaque, sealed envelopes),            |
| 4  | mechanism      |      | describing any steps to conceal the sequence until interventions are    |
| 5  |                |      | assigned                                                                |
| 6  |                |      |                                                                         |
| 7  | Implementation | 16c✓ | Who will generate the allocation sequence, who will enrol participants, |
| 8  |                |      | and who will assign participants to interventions                       |
| 9  |                |      |                                                                         |
| 10 | Blinding       | 17a✓ | Who will be blinded after assignment to interventions (eg, trial        |
| 11 | (masking)      |      | participants, care providers, outcome assessors, data analysts), and    |
| 12 |                |      | how                                                                     |
| 13 |                |      |                                                                         |
| 14 |                |      |                                                                         |
| 15 |                | 17b✓ | If blinded, circumstances under which unblinding is permissible, and    |
| 16 |                |      | procedure for revealing a participant's allocated intervention during   |
| 17 |                |      | the trial                                                               |
| 18 |                |      |                                                                         |
| 19 |                |      |                                                                         |

### Methods: Data collection, management, and analysis

|    |                 |      |                                                                          |
|----|-----------------|------|--------------------------------------------------------------------------|
| 20 |                 |      |                                                                          |
| 21 | Data collection | 18a✓ | Plans for assessment and collection of outcome, baseline, and other      |
| 22 | methods         |      | trial data, including any related processes to promote data quality (eg, |
| 23 |                 |      | duplicate measurements, training of assessors) and a description of      |
| 24 |                 |      | study instruments (eg, questionnaires, laboratory tests) along with      |
| 25 |                 |      | their reliability and validity, if known. Reference to where data        |
| 26 |                 |      | collection forms can be found, if not in the protocol                    |
| 27 |                 |      |                                                                          |
| 28 |                 |      |                                                                          |
| 29 |                 |      |                                                                          |
| 30 |                 | 18b✓ | Plans to promote participant retention and complete follow-up,           |
| 31 |                 |      | including list of any outcome data to be collected for participants who  |
| 32 |                 |      | discontinue or deviate from intervention protocols                       |
| 33 |                 |      |                                                                          |
| 34 | Data            | 19✓  | Plans for data entry, coding, security, and storage, including any       |
| 35 | management      |      | related processes to promote data quality (eg, double data entry;        |
| 36 |                 |      | range checks for data values). Reference to where details of data        |
| 37 |                 |      | management procedures can be found, if not in the protocol               |
| 38 |                 |      |                                                                          |
| 39 |                 |      |                                                                          |
| 40 | Statistical     | 20a✓ | Statistical methods for analysing primary and secondary outcomes.        |
| 41 | methods         |      | Reference to where other details of the statistical analysis plan can be |
| 42 |                 |      | found, if not in the protocol                                            |
| 43 |                 |      |                                                                          |
| 44 |                 |      |                                                                          |
| 45 |                 | 20b✓ | Methods for any additional analyses (eg, subgroup and adjusted           |
| 46 |                 |      | analyses)                                                                |
| 47 |                 |      |                                                                          |
| 48 |                 | 20c✓ | Definition of analysis population relating to protocol non-adherence     |
| 49 |                 |      | (eg, as randomised analysis), and any statistical methods to handle      |
| 50 |                 |      | missing data (eg, multiple imputation)                                   |
| 51 |                 |      |                                                                          |

### Methods: Monitoring

|    |                 |      |                                                                      |
|----|-----------------|------|----------------------------------------------------------------------|
| 52 |                 |      |                                                                      |
| 53 |                 |      |                                                                      |
| 54 | Data monitoring | 21a✓ | Composition of data monitoring committee (DMC); summary of its role  |
| 55 |                 |      | and reporting structure; statement of whether it is independent from |
| 56 |                 |      | the sponsor and competing interests; and reference to where further  |
| 57 |                 |      | details about its charter can be found, if not in the protocol.      |
| 58 |                 |      | Alternatively, an explanation of why a DMC is not needed             |
| 59 |                 |      |                                                                      |
| 60 |                 |      |                                                                      |

|    |          |      |                                                                        |
|----|----------|------|------------------------------------------------------------------------|
| 1  |          | 21b✓ | Description of any interim analyses and stopping guidelines, including |
| 2  |          |      | who will have access to these interim results and make the final       |
| 3  |          |      | decision to terminate the trial                                        |
| 4  |          |      |                                                                        |
| 5  |          |      |                                                                        |
| 6  | Harms    | 22✓  | Plans for collecting, assessing, reporting, and managing solicited and |
| 7  |          |      | spontaneously reported adverse events and other unintended effects     |
| 8  |          |      | of trial interventions or trial conduct                                |
| 9  |          |      |                                                                        |
| 10 |          |      |                                                                        |
| 11 | Auditing | 23✓  | Frequency and procedures for auditing trial conduct, if any, and       |
| 12 |          |      | whether the process will be independent from investigators and the     |
| 13 |          |      | sponsor                                                                |
| 14 |          |      |                                                                        |

### Ethics and dissemination

|    |                   |      |                                                                               |
|----|-------------------|------|-------------------------------------------------------------------------------|
| 15 |                   |      |                                                                               |
| 16 |                   |      |                                                                               |
| 17 | Research ethics   | 24✓  | Plans for seeking research ethics committee/institutional review board        |
| 18 | approval          |      | (REC/IRB) approval                                                            |
| 19 |                   |      |                                                                               |
| 20 |                   |      |                                                                               |
| 21 | Protocol          | 25✓  | Plans for communicating important protocol modifications (eg,                 |
| 22 | amendments        |      | changes to eligibility criteria, outcomes, analyses) to relevant parties      |
| 23 |                   |      | (eg, investigators, REC/IRBs, trial participants, trial registries, journals, |
| 24 |                   |      | regulators)                                                                   |
| 25 |                   |      |                                                                               |
| 26 | Consent or assent | 26a✓ | Who will obtain informed consent or assent from potential trial               |
| 27 |                   |      | participants or authorised surrogates, and how (see Item 32)                  |
| 28 |                   |      |                                                                               |
| 29 |                   |      |                                                                               |
| 30 |                   | 26b✓ | Additional consent provisions for collection and use of participant data      |
| 31 |                   |      | and biological specimens in ancillary studies, if applicable                  |
| 32 |                   |      |                                                                               |
| 33 | Confidentiality   | 27✓  | How personal information about potential and enrolled participants will       |
| 34 |                   |      | be collected, shared, and maintained in order to protect confidentiality      |
| 35 |                   |      | before, during, and after the trial                                           |
| 36 |                   |      |                                                                               |
| 37 | Declaration of    | 28✓  | Financial and other competing interests for principal investigators for       |
| 38 | interests         |      | the overall trial and each study site                                         |
| 39 |                   |      |                                                                               |
| 40 |                   |      |                                                                               |
| 41 | Access to data    | 29✓  | Statement of who will have access to the final trial dataset, and             |
| 42 |                   |      | disclosure of contractual agreements that limit such access for               |
| 43 |                   |      | investigators                                                                 |
| 44 |                   |      |                                                                               |
| 45 | Ancillary and     | 30✓  | Provisions, if any, for ancillary and post-trial care, and for                |
| 46 | post-trial care   |      | compensation to those who suffer harm from trial participation                |
| 47 |                   |      |                                                                               |
| 48 | Dissemination     | 31a✓ | Plans for investigators and sponsor to communicate trial results to           |
| 49 | policy            |      | participants, healthcare professionals, the public, and other relevant        |
| 50 |                   |      | groups (eg, via publication, reporting in results databases, or other         |
| 51 |                   |      | data sharing arrangements), including any publication restrictions            |
| 52 |                   |      |                                                                               |
| 53 |                   |      |                                                                               |
| 54 |                   | 31b✓ | Authorship eligibility guidelines and any intended use of professional        |
| 55 |                   |      | writers                                                                       |
| 56 |                   |      |                                                                               |
| 57 |                   | 31c✓ | Plans, if any, for granting public access to the full protocol, participant-  |
| 58 |                   |      | level dataset, and statistical code                                           |
| 59 |                   |      |                                                                               |
| 60 |                   |      |                                                                               |

**Appendices**

|                            |     |                                                                                                                                                                                                |
|----------------------------|-----|------------------------------------------------------------------------------------------------------------------------------------------------------------------------------------------------|
| Informed consent materials | 32✓ | Model consent form and other related documentation given to participants and authorised surrogates                                                                                             |
| Biological specimens       | 33✓ | Plans for collection, laboratory evaluation, and storage of biological specimens for genetic or molecular analysis in the current trial and for future use in ancillary studies, if applicable |

---

\*It is strongly recommended that this checklist be read in conjunction with the SPIRIT 2013 Explanation & Elaboration for important clarification on the items. Amendments to the protocol should be tracked and dated. The SPIRIT checklist is copyrighted by the SPIRIT Group under the Creative Commons "[Attribution-NonCommercial-NoDerivs 3.0 Unported](#)" license.

For peer review only

# BMJ Open

## Dexmedetomidine for the prevention of postoperative delirium in patients after intracranial operation for brain tumours (DEPOD study): a study protocol and statistical plan for a multicentre randomised controlled trial

|                                 |                                                                                                                                                                                                                                                                                                                                                                                                                                                                                                                                                                                                                                                                                                           |
|---------------------------------|-----------------------------------------------------------------------------------------------------------------------------------------------------------------------------------------------------------------------------------------------------------------------------------------------------------------------------------------------------------------------------------------------------------------------------------------------------------------------------------------------------------------------------------------------------------------------------------------------------------------------------------------------------------------------------------------------------------|
| Journal:                        | <i>BMJ Open</i>                                                                                                                                                                                                                                                                                                                                                                                                                                                                                                                                                                                                                                                                                           |
| Manuscript ID                   | bmjopen-2020-040939.R1                                                                                                                                                                                                                                                                                                                                                                                                                                                                                                                                                                                                                                                                                    |
| Article Type:                   | Protocol                                                                                                                                                                                                                                                                                                                                                                                                                                                                                                                                                                                                                                                                                                  |
| Date Submitted by the Author:   | 13-Oct-2020                                                                                                                                                                                                                                                                                                                                                                                                                                                                                                                                                                                                                                                                                               |
| Complete List of Authors:       | He, Xuan; Beijing Tiantan Hospital, Department of Critical Care Medicine; Capital Medical University<br>Cheng, Kun-Ming; Beijing Tiantan Hospital, Department of Critical Care Medicine; Capital Medical University<br>Zhang, Linlin; Beijing Tiantan Hospital, Department of Critical Care Medicine; Capital Medical University<br>Gu, Hongqiu; Beijing Tiantan Hospital,<br>Qu, Xin; Xuanwu Hospital, Department of Neurosurgery; Capital Medical University<br>Xu, Yuan; Tsinghua University; Beijing Tsinghua Changgung Hospital, ICU<br>Ma, Penglin; Peking University Third Hospital,<br>Zhou, Jian-Xin; Beijing Tiantan Hospital, Department of Critical Care Medicine; Capital Medical University |
| <b>Primary Subject Heading</b>: | Intensive care                                                                                                                                                                                                                                                                                                                                                                                                                                                                                                                                                                                                                                                                                            |
| Secondary Subject Heading:      | Anaesthesia                                                                                                                                                                                                                                                                                                                                                                                                                                                                                                                                                                                                                                                                                               |
| Keywords:                       | Adult intensive & critical care < ANAESTHETICS, NEUROSURGERY, Delirium & cognitive disorders < PSYCHIATRY                                                                                                                                                                                                                                                                                                                                                                                                                                                                                                                                                                                                 |
|                                 |                                                                                                                                                                                                                                                                                                                                                                                                                                                                                                                                                                                                                                                                                                           |

SCHOLARONE™  
Manuscripts



I, the Submitting Author has the right to grant and does grant on behalf of all authors of the Work (as defined in the below author licence), an exclusive licence and/or a non-exclusive licence for contributions from authors who are: i) UK Crown employees; ii) where BMJ has agreed a CC-BY licence shall apply, and/or iii) in accordance with the terms applicable for US Federal Government officers or employees acting as part of their official duties; on a worldwide, perpetual, irrevocable, royalty-free basis to BMJ Publishing Group Ltd ("BMJ") its licensees and where the relevant Journal is co-owned by BMJ to the co-owners of the Journal, to publish the Work in this journal and any other BMJ products and to exploit all rights, as set out in our [licence](#).

The Submitting Author accepts and understands that any supply made under these terms is made by BMJ to the Submitting Author unless you are acting as an employee on behalf of your employer or a postgraduate student of an affiliated institution which is paying any applicable article publishing charge ("APC") for Open Access articles. Where the Submitting Author wishes to make the Work available on an Open Access basis (and intends to pay the relevant APC), the terms of reuse of such Open Access shall be governed by a Creative Commons licence – details of these licences and which [Creative Commons](#) licence will apply to this Work are set out in our licence referred to above.

Other than as permitted in any relevant BMJ Author's Self Archiving Policies, I confirm this Work has not been accepted for publication elsewhere, is not being considered for publication elsewhere and does not duplicate material already published. I confirm all authors consent to publication of this Work and authorise the granting of this licence.

1  
2  
3  
4 **Dexmedetomidine for the prevention of postoperative delirium in patients after**  
5  
6 **intracranial operation for brain tumours (DEPOD study): a study protocol and**  
7  
8 **statistical plan for a multicentre randomised controlled trial**  
9  
10

11 Xuan He<sup>1</sup>, Kun-Ming Cheng<sup>1</sup>, Linlin Zhang<sup>1</sup>, Hong-Qiu Gu<sup>2</sup>, Qu Xin<sup>3</sup>, Yuan Xu<sup>4</sup>,  
12  
13 Peng-Lin Ma<sup>5</sup>, Jian-Xin Zhou<sup>1\*</sup>  
14  
15

16  
17 <sup>1</sup> Department of Critical Care Medicine, Beijing Tiantan Hospital, Capital Medical  
18  
19 University, Beijing, 100070, China  
20  
21

22 <sup>2</sup> China National Clinical Research Center for Neurological Diseases, Beijing Tiantan  
23  
24 Hospital, Capital Medical University, Beijing, 100070, China  
25  
26

27 <sup>3</sup> Department of Neurosurgical Critical Care, Xuanwu Hospital, Capital Medical  
28  
29 University, Beijing, 100053, China  
30  
31

32 <sup>4</sup> Department of Critical Care Medicine, Tsinghua University Affiliated Beijing  
33  
34 Tsinghua Changgung Hospital, Beijing, 102218, China  
35  
36

37 <sup>5</sup> Department of Critical Care Medicine, Peking University Third Hospital, Beijing,  
38  
39 100191, China  
40  
41

42 \* Corresponding author  
43  
44

45 Jian-Xin Zhou  
46  
47

48 Department of Critical Care Medicine, Beijing Tiantan Hospital, Capital Medical  
49  
50 University. No. 119, South 4th Ring West Road, Fengtai District, Beijing, 100070,  
51  
52  
53 China  
54

55 Telephone: +8610 59978019; Email: zhoujx.cn@icloud.com  
56  
57  
58  
59  
60



1  
2  
3  
4  
5  
6  
7  
8  
9  
10  
11  
12  
13  
14  
15  
16  
17  
18  
19  
20  
21  
22  
23  
24  
25  
26  
27  
28  
29  
30  
31  
32  
33  
34  
35  
36  
37  
38  
39  
40  
41  
42  
43  
44  
45  
46  
47  
48  
49  
50  
51  
52  
53  
54  
55  
56  
57  
58  
59  
60

Keywords: delirium, postoperative, intracranial operation, prevention,

dexmedetomidine

Word count: 3481

For peer review only

## ABSTRACT

**Introduction** Postoperative delirium (POD) is prevalent in patients after major surgery and is associated with adverse outcomes. Several studies have reported that dexmedetomidine, a highly selective  $\alpha_2$ -adrenergic receptor agonist, can decrease the incidence of POD. However, neurosurgical patients are usually excluded from previous studies. The present study was designed to investigate the impact of prophylactic use of low-dose dexmedetomidine on the incidence of POD in patients after intracranial operation.

**Methods and analysis** This is a multicentre, randomised, double-blinded and placebo-controlled trial. Seven hundred intensive care unit admitted patients after elective intracranial operation for brain tumours under general anaesthesia are randomly assigned to the dexmedetomidine group or the placebo group with a 1:1 ratio. For patients in the dexmedetomidine group, a continuous infusion of dexmedetomidine will be started at a rate of 0.1  $\mu\text{g}/\text{kg}/\text{hour}$  immediately after enrolment on the day of operation and continued until 08:00 AM on the postoperative day one. For patients in the placebo group, normal saline will be administered at the same rate as in the dexmedetomidine group. The patients will be followed up for 28 days after enrolment. The primary endpoint is the incidence of POD, which is assessed twice daily using the Confusion Assessment Method for the Intensive Care Unit, during the first five postoperative days. The secondary endpoints include the incidence of dexmedetomidine related adverse events and non-delirium complications, the length of stay in the ICU and hospital and all-cause 28-day

1  
2  
3  
4 mortality after the operation.  
5

6 **Ethics and dissemination** The study protocol was approved by the Institutional  
7  
8  
9 Review Board of Beijing Tiantan Hospital Affiliated to Capital Medical University  
10  
11 (No KY2019-091-02) and registered at ClinicalTrials.gov. The results of the trial will  
12  
13  
14 be presented at national and international conferences relevant to subject fields and  
15  
16  
17 submitted to international peer-reviewed journals.  
18

19 **Trial registration number** NCT04399343; Pre-results.  
20  
21  
22  
23  
24  
25  
26  
27  
28  
29  
30  
31  
32  
33  
34  
35  
36  
37  
38  
39  
40  
41  
42  
43  
44  
45  
46  
47  
48  
49  
50  
51  
52  
53  
54  
55  
56  
57  
58  
59  
60

### Main strengths and limitations of the study

- The study design will be multicentre, randomised, double-blinded and placebo-controlled, with a relatively large sample size.
- To the best of our knowledge, this is the first study to evaluate the effect of prophylactic use of dexmedetomidine on postoperative delirium in neurosurgical patients.
- Only intensive care unit admitted patients are included, which will limit the generalizability of the results.
- Only early outcomes are assessed including the incidence of postoperative delirium and other endpoints up to 28 days after the operation.
- Although patients with medical records documented preoperative history of mental or cognitive disorders are excluded, no systematic cognitive assessment will be performed before the intracranial operation.

## BACKGROUND

Postoperative delirium (POD) is one of the main postoperative complications after major surgery, especially in patients admitted to the intensive care unit (ICU) [1, 2]. Studies have shown that POD is associated with adverse outcomes, including prolonged length of stay in the ICU and hospital, higher morbidity and mortality risks, increased healthcare costs, and reduced long-term quality of life [3-5]. However, patients with neurological illness are usually excluded from previous researches, and delirium is underestimated due to potential consciousness and cognition impairment [6, 7]. Recently, more attention has been devoted to POD in patients after neurosurgery [8-11]. In our cohort with 800 adult patients admitted to the ICU after elective intracranial operation under general anaesthesia, delirium was screened within three days after the surgery [8]. The incidence of POD is about 20%, which is comparable to the results in the control group of randomised controlled trials with non-neurosurgical patients (18% to 21%) [12-14]. Potential associations between POD and adverse outcomes have also been reported in neurosurgical patients [8-11]. These results indicate that early prevention of POD should be employed in this population.

Perioperative preventive medications have been an active area of clinical POD researches [15]. As a highly selective  $\alpha_2$ -adrenergic receptor agonist, dexmedetomidine has been investigated as a preventive agent for POD [12-14]. Systematic reviews and meta-analyses of randomised controlled trials have shown that perioperative administration of dexmedetomidine may decrease the incidence of

1  
2  
3  
4 POD [12], in patients after either cardiac [13] or non-cardiac surgery [14]. However,  
5  
6  
7 neurosurgical patients are often excluded in randomised controlled trials of POD [12,  
8  
9  
10 14].

11  
12 In a randomised controlled trial in patients with delayed extubation after craniotomy  
13  
14 [16], we found that early prophylactic use of dexmedetomidine during the first 24  
15  
16  
17 hours after the operation significantly reduced the incidence of agitation, which might  
18  
19  
20 include some hyperactive delirium. In this study, an infusion rate of dexmedetomidine  
21  
22  
23 was set at 0.6 µg/kg/hour, which did not produce respiratory depression but increased  
24  
25  
26 the incidence of bradycardia. In a recent randomised controlled trial in elderly patients  
27  
28  
29 after non-cardiac surgery and admitted to the ICU, prophylactic use of low-dose (0.1  
30  
31  
32 µg/kg/hour) dexmedetomidine significantly decreased the incidence of POD without  
33  
34  
35 the increased occurrence of hypotension and bradycardia [17]. A randomised  
36  
37  
38 controlled trial in critically ill adults also demonstrated that nocturnal administration  
39  
40  
41 of low-dose dexmedetomidine reduced the incidence of delirium during the ICU stay  
42  
43  
44 [18].

45  
46 The above findings encouraged us to design a multicentre randomised controlled trial,  
47  
48 DExmedetomidine for the prevention of PostOperative Delirium (DEPOD study),  
49  
50  
51 aiming to evaluate the efficacy and safety of low-dose dexmedetomidine for  
52  
53  
54 prevention of POD in patients after intracranial operation for brain tumours. The  
55  
56  
57 primary hypothesis is that, compared to the placebo group, the prophylactic use of  
58  
59  
60 low-dose dexmedetomidine can decrease the incidence of POD without significant  
adverse events in this population.

## METHODS AND ANALYSIS

### Study design

This prospective, multicentre, randomised, double-blinded and placebo-controlled trial with two parallel arms was designed to test whether the prophylactic use of low-dose dexmedetomidine would decrease the incidence of POD in adult patients admitted to the ICU after elective intracranial operation for brain tumours. The design of the present study has adhered to the Standard Protocol Items for Randomized Trials [19].

The flow chart of the trial is shown in figure 1.

### Patient and public involvement

Patients and the public are not involved in the design or conduct of the study. There is no plan to disseminate our results to study participants.

### Study locations

The study will be conducted in five ICUs in four teaching hospitals including Beijing Tiantan hospital (one general ICU and one neurosurgical ICU with a total of 50 beds) and Xuanwu hospital (one neurosurgical ICU with 30 beds) affiliated to Capital Medical University, Peking University Third Hospital (one general ICU with 30 beds), and Beijing Tsinghua Changgung Hospital affiliated to Tsinghua University (one general ICU with 20 beds), in Beijing, China.

## Participants

Potential eligible participants are screened on admission to the ICU.

The inclusion criteria are adult patients after elective intracranial operation for brain tumours under general anaesthesia and who are admitted to the ICU directly from the operating room or postoperative care unit.

The exclusion criteria include:

1. Age younger than 18 years;
2. Admitted to the ICU after 22:00 PM;
3. Medical records documented preoperative history of mental or cognitive disorders including schizophrenia, epilepsy, Parkinsonism, or dementia;
4. Medical records documented inability to communicate in the preoperative period due to coma or language barrier;
5. History of drug abuse of psychoactive and anaesthetic drugs;
6. Known preoperative severe bradycardia (lower than 50 beats/min), sick sinus syndrome, second- or third-degree atrioventricular block, or left ventricular ejection fraction lower than 30%;
7. Serious hepatic dysfunction (Child-Pugh class C);
8. Severe renal dysfunction requiring renal replacement therapy before the surgery;
9. Allergies to ingredients or components of 5-[(1S)-1-(2,3-dimethylphenyl)ethyl]-1H-imidazole (dexmedetomidine hydrochloride);
10. American Society of Anesthesiologists (ASA) classification of IV to VI;
11. Moribund condition with a low likelihood of survival for more than 24 hours;



- 1
- 2
- 3
- 4 12. Pregnancy or lactation women;
- 5
- 6 13. Current enrolment in another clinical trial;
- 7
- 8
- 9 14. Refusal to participate.
- 10

11 Once the patient's eligibility is confirmed, a 24-hour on-call study coordinator will be  
12 contacted. Each relevant aspect of the project will be described and written informed  
13 consent will be obtained from the patient. If the patient cannot provide consent,  
14 written informed consent will be obtained from their authorized representatives. The  
15 study coordinator will be particularly careful to assure the patients or their authorized  
16 representatives that they are free to decline consent without consequences, and that  
17 they can withdraw consent at any time without an impact on treatment.  
18  
19  
20  
21  
22  
23  
24  
25  
26  
27  
28  
29  
30  
31

### 32 **Randomisation, allocation concealment and blinding**

33 After obtaining informed consent, the enrolled patients are randomly allocated to  
34 receive a continuous intravenous infusion of dexmedetomidine or placebo (normal  
35 saline).  
36  
37  
38  
39  
40  
41  
42

43 To ensure allocation concealment of the randomisation, a password-protected central  
44 randomisation system is established and applied. A biostatistician who will not  
45 participate in data management and statistical analysis generates random numbers in a  
46 1:1 ratio using the SAS 9.2 software (SAS Institute, Cary, NC). The stratification is  
47 performed among the five participating ICUs with prespecified block sizes depending  
48 on the anticipated number of recruitments. The random allocation sequence remains  
49 concealed from investigators in charge of enrolment. When the patient's enrolment is  
50  
51  
52  
53  
54  
55  
56  
57  
58  
59  
60

1  
2  
3  
4 confirmed, the investigator will log in to the central randomisation system, complete  
5  
6 the checklist of inclusion and exclusion criteria, and acquire the random number. A  
7  
8 pharmacist in each centre who has no knowledge of patients before the randomisation  
9  
10 and will not participate in the rest of the study provides the study agents according to  
11  
12 the randomisation results.  
13  
14

15  
16 The experimental agents (dexmedetomidine hydrochloride 200 µg/2 ml or normal  
17  
18 saline 2 ml) are manufactured and provided by the Jiangsu Nhwa Pharmaceutical Co.,  
19  
20 Ltd (Jiangsu, China). The agents are packed as clear aqueous solutions with the same  
21  
22 character in the same 3-ml ampoules.  
23  
24

25  
26 Information on randomisation and group allocation will be blinded from the patients,  
27  
28 the investigators who perform data collection and follow-up, the ICU physicians and  
29  
30 other healthcare providers who are responsible for patients care. Blinding will be  
31  
32 maintained throughout the entire research period.  
33  
34

35  
36 During the study, group allocation can be unmasked in order to protect the patient's  
37  
38 safety. Investigators can request an urgent unmasking to the central randomisation  
39  
40 system if considered necessary in case of the occurrence of severe adverse events or  
41  
42 any unexpected deterioration of the patient's condition. Because each ampoule  
43  
44 containing an experimental drug or placebo has a unique randomisation number, this  
45  
46 emergency unmasking will not reveal the group allocations in other enrolled patients.  
47  
48 The unmasked patients will be included in the intention-to-treat analysis.  
49  
50  
51  
52  
53  
54  
55  
56  
57

### 58 **Data collected at study entry**

59  
60

1  
2  
3  
4 At baseline, demographic data, history of past illnesses and diagnosis of the patients  
5  
6 are obtained. The surgical site and approach, body position, malignant tumour,  
7  
8 intraoperative medications, fluid balance during operation, the amount of bleeding  
9  
10 and blood transfusion during operation, episode of hypoxemia and hypotension during  
11  
12 operation and duration of operation are recorded. The presence of an endotracheal  
13  
14 tube and the need for mechanical ventilation on ICU admission are documented. The  
15  
16 Acute Physiology and Chronic Health Evaluation II score (APACHE II) and Glasgow  
17  
18 Coma Scale (GCS) are calculated. The time interval between the end of operation and  
19  
20 study drug infusion is recorded.  
21  
22  
23  
24  
25

26  
27 Before the start of study agent infusion, delirium is evaluated using the Confusion  
28  
29 Assessment Method for the ICU (CAM-ICU) [20-22] and documented as emergence  
30  
31 delirium.  
32  
33  
34  
35  
36

### 37 **Trial interventions and management of pain, agitation and delirium**

38  
39 All enrolled patients will be randomly allocated to receive a continuous intravenous  
40  
41 infusion of dexmedetomidine hydrochloride (dexmedetomidine group) or normal  
42  
43 saline (placebo group).  
44  
45  
46

47  
48 The study agent (dexmedetomidine hydrochloride 200 µg/2 ml or normal saline 2 ml)  
49  
50 is diluted with normal saline to 50 ml and continuously infused at a rate of 0.025  
51  
52 ml/kg/hour. This represents an infusion rate of 0.1 µg/kg/hour dexmedetomidine  
53  
54 hydrochloride in the dexmedetomidine group.  
55  
56

57  
58 The intravenous infusion will be started immediately after enrolment and continued  
59  
60

1  
2  
3  
4 until 08:00 AM on the postoperative day one. During the study, scopolamine and  
5  
6 penehyclidine will not be given. Open-labelled dexmedetomidine will be prohibited.  
7  
8  
9 Atropine can only be applied to treat bradycardia.

10  
11 Routine clinical managements of pain, agitation and delirium have been established  
12  
13 according to the recommendations in guidelines proposed by the American Society of  
14  
15 Critical Care Medicine [23] and the European Society of Anaesthesiology [1] in all  
16  
17 participating ICUs [8, 16, 24-26]. During the study protocol group discussion and  
18  
19 training, several key elements in comprehensive approaches to reduce POD have been  
20  
21 highlighted and emphasized as following:  
22  
23  
24  
25

- 26  
27 1. Regular pain assessment is performed using patient's self-reported scales such as  
28  
29 the Numeric Rating Scale (NRS) and the Visual Analogue Scale (VAS), and if  
30  
31 impossible, using behavioural pain scales such as the Behavioral Pain Scale  
32  
33 (BPS) and the Critical-Care Pain Observation Tool (CPOT);  
34  
35
- 36  
37 2. Opioids or nonsteroidal anti-inflammatory drugs should be used in patients who  
38  
39 require analgesia;  
40  
41
- 42  
43 3. Regular agitation-sedation assessment is performed using the Richmond  
44  
45 Agitation-Sedation Scale (RASS) or the Sedation-Agitation Scale (SAS);  
46  
47
- 48  
49 4. If the patients exhibit agitation, sedation should be initiated using common  
50  
51 sedatives including propofol and midazolam. Although midazolam is available, it  
52  
53 is not recommended as the priority of sedative drugs;  
54  
55
- 56  
57 5. A light sedation depth is recommended to maintain a RASS score of -2 to +1 or a  
58  
59 SAS score of 3 to 5.  
60

- 1  
2  
3  
4 6. In conjunction with the recent clinical guidelines for ICU delirium [27], we  
5  
6 recommend that repeated reorientation, cognitive stimulation, early mobilization,  
7  
8 sleep-promotion strategies, and hearing or vision aids should be performed as  
9  
10 long as possible;  
11  
12
- 13  
14 7. Patients who develop POD are first given non-pharmacological treatments listed  
15  
16 above. Pharmacological treatment is only reserved for patients with hyperactive  
17  
18 delirium with disorientated agitation. Haloperidol (0.5 to 2 mg) can be  
19  
20 intravenously injected followed by the administration of half of the loading dose  
21  
22 for every 4 to 6 hours until the control of the severe hyperactive delirium.  
23  
24  
25

26  
27 The routine patient management and ICU discharge will be decided by the  
28  
29 responsible ICU physicians. The hospital discharge will be decided by the responsible  
30  
31 neurosurgeons.  
32  
33

### 34 35 36 37 **Adverse events management**

38  
39 Adverse events will be monitored from the start of study agent infusion until 24 hours  
40  
41 or until ICU discharge. Investigators should record all the adverse events including  
42  
43 the type, diagnosis time, duration and consequences. Predicted adverse events in the  
44  
45 present study include bradycardia (defined as heart rate lower than 50 beats/min),  
46  
47 hypotension (defined as systolic blood pressure lower than 90 mmHg), and  
48  
49 hypoxemia (defined as pulse oxygen saturation lower than 90%) [16, 17].  
50  
51  
52

53  
54  
55  
56 Attending ICU physicians can stop the study agent infusion in the following cases:

- 57  
58 1. Heart rate lower than 40 beats/min after atropine in 0.25 mg intravenous bolus;  
59  
60

2. Systolic blood pressure lower than 90 mmHg after fluid resuscitation with 250 ml crystalloid solution infusion within 15 min;
3. Peripheral pulse oxygen saturation lower than 90% after administration of oxygen and adjustment of mechanical ventilation for patients without and with endotracheal intubation, respectively;
4. Other conditions deemed necessary by the ICU physician.

In these cases, the reasons that lead to any protocol interruption are documented and reported to the Institutional Review Board of Beijing Tiantan Hospital Affiliated to Capital Medical University within 24 hours. Patients with study protocol interruption will be included in the intention-to-treat analysis.

### **Outcome measurements**

The patients will be followed up twice daily during the first five postoperative days, and then weekly until hospital discharge or until 28 days after the operation.

Investigators who are responsible for follow-up will not involve in the study agent infusion and patient care, and they are not allowed to exchange patient's information with ICU physicians taking care of the patients.

The primary endpoint is the incidence of POD during the first five postoperative days [1]. Delirium is evaluated twice daily (08:00 AM to 10:00 AM and 18:00 PM to 20:00 PM) until the fifth postoperative day by the CAM-ICU [20-22]. Before the initiation of the trial, investigators in each participating ICU are trained to follow the study protocol and to perform the CAM-ICU evaluation. Thereafter, the training will be

1  
2  
3  
4 performed at an interval of 3 months during the study. An expert from the Department  
5  
6 of Psychiatry is invited to provide the training. The training courses consist of three  
7  
8 phases: (1) group training with information about delirium, RASS and CAM-ICU, as  
9  
10 well as a video demonstrating the detailed conduction of CAM-ICU assessment; (2)  
11  
12 one-to-one instruction at the bedside; (3) examination on five patients who have been  
13  
14 pre-assessed by the expert. Different results of delirium assessment between the  
15  
16 trainee and the expert will be discussed until 100% agreement is reached.  
17  
18  
19  
20  
21

22 Secondary endpoints include:

- 23  
24 1. Incidence of adverse events from the start of study agent infusion until 24 hours  
25  
26 or until ICU discharge;
- 27  
28 2. Incidence of non-delirium complications after the operation until 28 days,  
29  
30 including airway obstruction and apnoea, respiratory failure, cardiac events,  
31  
32 coma, epilepsy, cerebral haemorrhage or infarction, renal injury and infection;  
33  
34
- 35  
36 3. Length of stay in the ICU and hospital after the operation;
- 37  
38 4. All-cause 28-day mortality after the operation.  
39  
40  
41  
42

43 Additional pre-specified endpoints include the use of sedatives and analgesics during  
44  
45 the study agent infusion, pain intensity (assessed by CPOT) [23, 27] and subjective  
46  
47 sleep quality (assessed by NRS) [28] in the morning of postoperative day one.  
48  
49  
50  
51  
52

### 53 **Data management and monitoring**

54 Table 1 shows data collection at each time point.  
55  
56

57  
58 Before the initiation of the study, an electronic case report form (eCRF) is established  
59  
60

1  
2  
3  
4 and available online at a dedicated website with password-protected access for each  
5  
6 participating centre. Each enrolled patient will be assigned an identification number.  
7  
8 Patient data will be coded and kept confidential. Related paper records will be stored  
9  
10 in a locked cabinet in an access-controlled room.  
11  
12

13  
14 Each participating centre will indicate a local coordinator in charge of the study. The  
15  
16 local coordinators guarantee the integrity of data collection and timely completion of  
17  
18 the eCRF.  
19  
20

21  
22 Data quality and safety will be monitored by an independent Data and Safety  
23  
24 Monitoring Board, which will be composed of five multidisciplinary experts who are  
25  
26 not have subordinate relationships with any members of the research team. Data  
27  
28 management and statistical analysis will be performed by the China National Clinical  
29  
30 Research Center for Neurological Diseases in Beijing Tiantan Hospital. Because  
31  
32 dexmedetomidine has been widely used in the ICU and its safety has been confirmed  
33  
34 in the previous studies [16, 17], an interim analysis will not be scheduled. Severe  
35  
36 adverse events will be reported to the Institutional Review Board of Beijing Tiantan  
37  
38 Hospital Affiliated to Capital Medical University within 24 hours.  
39  
40  
41  
42  
43  
44  
45  
46  
47

#### 48 **Current sample size justification**

49

50 In four observational studies, including 2769 patients after intracranial operation,  
51  
52 POD occurred in 349 patients with an overall pooled crude incidence of 13% [8-11].  
53  
54 A recent meta-analysis of non-cardiac patients showed that the incidence of POD  
55  
56 reduced by approximately half when dexmedetomidine was used perioperatively [14].  
57  
58  
59  
60



1  
2  
3  
4 We assume that the incidence of POD would be reduced by one-third in the  
5  
6 dexmedetomidine group compared with the placebo group in the present study. With  
7  
8 a significance and power set at 0.05 (two-sided) and 80%, respectively, the sample  
9  
10 size required to detect difference is 1088 patients. Taking into account about 5% of  
11  
12 the loss to follow-up rate, 1140 (570 in each group) patients need to be enrolled.  
13  
14  
15

### 16 **Statistical analysis**

17  
18 All analyses will be conducted according to the intention-to-treat principle, that is, all  
19  
20 randomised patients will be analysed in the groups to which they have been originally  
21  
22 allocated and will be blinded to treatment assignment.  
23  
24  
25

26  
27 Categorical variables will be presented as numbers and percentages, and analysed by  
28  
29 the  $\chi^2$ -test. Continuous variables will be checked for normal distribution and  
30  
31 presented as mean and standard deviation or median and interquartile range as  
32  
33 appropriate. Comparison of continuous variables will be performed by Student's t-test  
34  
35 for normally distributed variables and the Mann-Whitney U test for non-normally  
36  
37 distributed variables. Time-to-event variables will be analysed by survival analysis,  
38  
39 with the difference between groups assessed with Log-Rank test.  
40  
41  
42  
43  
44

45  
46 Post-hoc analyses were be performed by stratifying the patients with intra-axial vs.  
47  
48 extra-axial tumour, tumour located in supratentorial vs. infratentorial region, and  
49  
50 craniotomy via frontal vs. non-frontal approach.  
51

52  
53 Statistical analysis will be performed using SPSS 20.0 (SPSS Inc., Chicago, IL, USA)  
54  
55 and SAS 9.2 software (SAS Institute, Cary, NC). A *p*-value of less than 0.05 is  
56  
57 considered statistically significant.  
58  
59  
60

### **Ethics and dissemination**

The study protocol was approved by the Institutional Review Board of Beijing Tiantan Hospital Affiliated to Capital Medical University (No KY2019-091-02) and registered at ClinicalTrials.gov (NCT04399343, Pre-results). The results of the trial will be presented at national and international conferences relevant to subject fields and submitted to international peer-reviewed journals.

For peer review only

## SUMMARY

This multicentre, randomised, placebo-controlled, double-blinded trial is designed to investigate the effect of prophylactic use of low-dose dexmedetomidine on the incidence of POD in adult patients admitted to the ICU after intracranial operation for brain tumours.

In the present study, the CAM-ICU is used for the POD diagnosis because all enrolled patients will be admitted to the ICU for postoperative care. In our previous cohort study with 800 neurosurgical patients admitted to the ICU after intracranial operations, 28% of the patients remained endotracheal intubation [8]. The CAM-ICU has been validated in mechanically ventilated patients [20] and non-intubated ICU patients [21]. The Chinese version of the CAM-ICU has been validated in the ICU setting in mainland China [22], and the feasibility has been established in studies reported by our group and others [8, 17]. The CAM-ICU is recommended as a delirium screening tool by the American Society of Critical Care Medicine in adult ICU patients [23, 27] and by the European Society of Anaesthesiology in postoperative patients [1]. We will conduct the screening of delirium twice daily from postoperative day one to day five, which is in accordance with the recommendation provided by the European Society of Anaesthesiology evidence-based and consensus-based guideline on POD [1]. The first POD assessment is performed in the morning on postoperative day one, which will be around 24 hours after the operation. This timing of the first assessment is selected to avoid the bias resulting from the diagnosis of emergence delirium, which may be only related to the influence of hypnotics [5,

1  
2  
3  
4 29]. Furthermore, investigators in each participating ICU who are in charge of  
5  
6 postoperative follow-up are trained by a psychiatrist before the initiation of the study  
7  
8 to guarantee the quality of the CAM-ICU evaluation.  
9

10  
11 We design a low-dose dexmedetomidine infusion (0.1 µg/kg/hour) in the present  
12  
13 study to avoid drug-related hemodynamic adverse events such as severe bradycardia  
14  
15 demonstrated in our previous study [16]. The efficacy and safety of this  
16  
17 dexmedetomidine dosing regimen have been validated in previous studies in elderly  
18  
19 patients after non-cardiac surgery [30].  
20  
21  
22  
23

24  
25 The main strength of the present study is the design of a multicentre, randomised,  
26  
27 placebo-controlled and double-blinded trial with a relatively large sample size. To the  
28  
29 best of our knowledge, this is the first study to evaluate the impact of pharmacological  
30  
31 interventions on POD in neurosurgical patients admitted to ICU. The results of the  
32  
33 study will provide high-quality evidence. There are also several limitations to our  
34  
35 study. First, we will only enrol patients admitted to the ICU, which may represent a  
36  
37 population at high risk of POD [3-5]. Thus, our results may be limited for  
38  
39 generalizing to the entire population of patients undergoing intracranial surgery.  
40  
41  
42  
43 Second, we only evaluate early outcomes up to 28 days after the operation. Third,  
44  
45 although we exclude patients with medical records documented preoperative history  
46  
47 of mental or cognitive disorders, no systematic cognitive assessment will be  
48  
49 performed before the intracranial operation. Forth, the hemodynamic effects of  
50  
51 dexmedetomidine such as bradycardia might weaken the efficiency of masking to the  
52  
53 treating physicians in the ICU. However, investigators who are responsible for  
54  
55  
56  
57  
58  
59  
60

1  
2  
3  
4 follow-up will not involve in the study agent infusion and patient care. Additionally,  
5  
6 the exchange of patient's information is not allowed between investigators in charge  
7  
8  
9 of follow-up and ICU physicians taking care of the patients. This will decrease the  
10  
11 risk of unmasking to the greatest extent.  
12  
13  
14  
15  
16

### 17 **Trial status**

18  
19 At the time of manuscript submission, the study is in the preparation phase for  
20  
21 recruitment.  
22  
23  
24  
25  
26  
27  
28  
29  
30  
31  
32  
33  
34  
35  
36  
37  
38  
39  
40  
41  
42  
43  
44  
45  
46  
47  
48  
49  
50  
51  
52  
53  
54  
55  
56  
57  
58  
59  
60

For peer review only

## REFERENCES

1. Aldecoa C, Bettelli G, Bilotta F, *et al.* European Society of Anaesthesiology evidence-based and consensus-based guideline on postoperative delirium. *Eur J Anaesthesiol* 2017;34:192-214.
2. Mahanna-Gabrielli E, Schenning KJ, Eriksson LI, *et al.* State of the clinical science of perioperative brain health: report from the American Society of Anesthesiologists Brain Health Initiative Summit 2018. *Br J Anaesth* 2019;123:464-78.
3. Whitlock EL, Vannucci A, Avidan MS. Postoperative delirium. *Minerva Anesthesiol* 2011;77:448-56.
4. Inouye SK, Westendorp RG, Saczynski JS. Delirium in elderly people. *Lancet* 2014;383(9920):911-22.
5. Olotu C. Postoperative neurocognitive disorders. *Curr Opin Anaesthesiol* 2020;33:101-08.
6. Teitelbaum JS, Ayoub O, Skrobik Y. A critical appraisal of sedation, analgesia and delirium in neurocritical care. *Can J Neurol Sci* 2011;38:815-25.
7. Yu A, Teitelbaum J, Scott J, *et al.* Evaluating pain, sedation, and delirium in the neurologically critically ill-feasibility and reliability of standardized tools: a multi-institutional study. *Crit Care Med* 2013;41:2002-7.
8. Wang CM, Huang HW, Wang YM, *et al.* Incidence and risk factors of postoperative delirium in patients admitted to the ICU after elective intracranial surgery: A prospective cohort study. *Eur J Anaesthesiol* 2020;37:14-24.

- 1  
2  
3  
4 9. Hong Chen MN, Jiang H, Chen B, *et al.* The incidence and predictors of  
5  
6 postoperative delirium (POD) after brain tumor resection in adults: A cross-  
7  
8 sectional survey. *World Neurosurg* 2020 May 3; Online ahead of print.  
9  
10
- 11  
12 10. Budenas A, Tamasauskas S, Sliuzys A, *et al.* Incidence and clinical significance  
13  
14 of postoperative delirium after brain tumor surgery. *Acta Neurochir (Wien)*  
15  
16 2018;160:2327-37.  
17  
18
- 19  
20 11. Flanigan PM, Jahangiri A, Weinstein D, *et al.* Postoperative Delirium in  
21  
22 Glioblastoma Patients: Risk Factors and Prognostic Implications. *Neurosurgery*  
23  
24 2018;83:1161-72.  
25  
26
- 27  
28 12. Duan X, Coburn M, Rossaint R, *et al.* Efficacy of perioperative dexmedetomidine  
29  
30 on postoperative delirium: systematic review and meta-analysis with trial  
31  
32 sequential analysis of randomised controlled trials. *Br J Anaesth* 2018;121:384-  
33  
34 97.  
35  
36
- 37  
38 13. Wu M, Liang Y, Dai Z, *et al.* Perioperative dexmedetomidine reduces delirium  
39  
40 after cardiac surgery: A meta-analysis of randomized controlled trials. *J Clin*  
41  
42 *Anesth* 2018;50:33-42.  
43  
44
- 45  
46 14. Zeng H, Li Z, He J, *et al.* Dexmedetomidine for the prevention of postoperative  
47  
48 delirium in elderly patients undergoing noncardiac surgery: A meta-analysis of  
49  
50 randomized controlled trials. *PLoS One* 2019;14:e0218088.  
51  
52
- 53  
54 15. Magoon R, Kumar AK, Malik V, *et al.* Dexmedetomidine and postoperative  
55  
56 delirium: Decoding the evidence! *J Anaesthesiol Clin Pharmacol* 2020;36:140-  
57  
58 41.  
59  
60

- 1  
2  
3  
4 16. Zhao LH, Shi ZH, Chen GQ, *et al.* Use of Dexmedetomidine for Prophylactic  
5  
6 Analgesia and Sedation in Patients With Delayed Extubation After Craniotomy:  
7  
8 A Randomized Controlled Trial. *J Neurosurg Anesthesiol* 2017;29:132-39.  
9  
10
- 11  
12 17. Su X, Meng ZT, Wu XH, *et al.* Dexmedetomidine for prevention of delirium in  
13  
14 elderly patients after non-cardiac surgery: a randomised, double-blind, placebo-  
15  
16 controlled trial. *Lancet* 2016;388(10054):1893-902.  
17  
18
- 19  
20 18. Skrobik Y, Duprey MS, Hill NS, *et al.* Low-Dose Nocturnal Dexmedetomidine  
21  
22 Prevents ICU Delirium. A Randomized, Placebo-controlled Trial. *Am J Respir*  
23  
24 *Crit Care Med* 2018;197:1147-56.  
25  
26
- 27  
28 19. Chan AW, Tetzlaff JM, Altman DG, *et al.* SPIRIT 2013 statement: defining  
29  
30 standard protocol items for clinical trials. *Ann Intern Med* 2013;158:200-7.  
31  
32
- 33  
34 20. Ely EW, Inouye SK, Bernard GR, *et al.* Delirium in mechanically ventilated  
35  
36 patients: validity and reliability of the confusion assessment method for the  
37  
38 intensive care unit (CAM-ICU). *JAMA* 2001;286:2703-10.  
39  
40
- 41  
42 21. Ely EW, Margolin R, Francis J, *et al.* Evaluation of delirium in critically ill  
43  
44 patients: validation of the Confusion Assessment Method for the Intensive Care  
45  
46 Unit (CAM-ICU). *Crit Care Med* 2001;29:1370-9.  
47  
48
- 49  
50 22. Wang C, Wu Y, Yue P, *et al.* Delirium assessment using Confusion Assessment  
51  
52 Method for the Intensive Care Unit in Chinese critically ill patients. *J Crit Care*  
53  
54 2013;28:223-9.  
55  
56
- 57  
58 23. Barr J, Fraser GL, Puntillo K, *et al.* Clinical practice guidelines for the  
59  
60 management of pain, agitation, and delirium in adult patients in the intensive care



- 1  
2  
3  
4 unit. *Crit Care Med* 2013;41:263-306.  
5  
6  
7 24. Wu YX, Chen H, Li Q, *et al.* The Prophylactic Use of Remifentanyl for Delayed  
8  
9 Extubation After Elective Intracranial Operations: a Prospective, Randomized,  
10  
11 Double-Blinded Trial. *J Neurosurg Anesthesiol* 2017;29:281-90.  
12  
13  
14 25. Huang HW, Yan LM, Yang YL, *et al.* Bi-frontal pneumocephalus is an  
15  
16 independent risk factor for early postoperative agitation in adult patients admitted  
17  
18 to intensive care unit after elective craniotomy for brain tumor: A prospective  
19  
20 cohort study. *PLoS One* 2018;13:e0201064.  
21  
22  
23  
24 26. Shan K, Cao W, Yuan Y, *et al.* Use of the critical-care pain observation tool and  
25  
26 the bispectral index for the detection of pain in brain-injured patients undergoing  
27  
28 mechanical ventilation: A STROBE-compliant observational study. *Medicine*  
29  
30 *(Baltimore)* 2018;97:e10985.  
31  
32  
33  
34 27. Devlin JW, Skrobik Y, Gelinas C, *et al.* Clinical Practice Guidelines for the  
35  
36 Prevention and Management of Pain, Agitation/Sedation, Delirium, Immobility,  
37  
38 and Sleep Disruption in Adult Patients in the ICU. *Crit Care Med* 2018;46:e825-  
39  
40 e73.  
41  
42  
43  
44 28. Ritmala-Castren M, Lakanmaa RL, Virtanen I, *et al.* Evaluating adult patients'  
45  
46 sleep: an integrative literature review in critical care. *Scand J Caring Sci*  
47  
48 2014;28:435-48.  
49  
50  
51  
52 29. Munk L, Andersen G, Moller AM. Post-anaesthetic emergence delirium in adults:  
53  
54 incidence, predictors and consequences. *Acta Anaesthesiol Scand* 2016;60:1059-  
55  
56 66.  
57  
58  
59  
60

- 1  
2  
3  
4 30. Shen QH, Li HF, Zhou XY, *et al.* Dexmedetomidine in the prevention of  
5  
6 postoperative delirium in elderly patients following non-cardiac surgery: A  
7  
8 systematic review and meta-analysis. *Clin Exp Pharmacol Physiol* 2020 Mar 25;  
9  
10 Online ahead of print.  
11  
12  
13  
14  
15  
16  
17  
18  
19  
20  
21  
22  
23  
24  
25  
26  
27  
28  
29  
30  
31  
32  
33  
34  
35  
36  
37  
38  
39  
40  
41  
42  
43  
44  
45  
46  
47  
48  
49  
50  
51  
52  
53  
54  
55  
56  
57  
58  
59  
60

For peer review only

## Contributors

J-XZ planned the study. H-QG performed the statistical design of the study. All authors contributed to the design and development of the trial (XH, K-MC, LZ, H-QG, XQ, YX, P-LM and J-XZ). XH and J-XZ drafted the manuscript. LZ critically revised the manuscript. All authors read and approved the final manuscript.

## Funding

The study was supported by a grant from the Chinese Stroke Association (CSA2019KY005). The sponsors have no role in the study design and conduct; the data collection, management, analysis and interpretation; or the preparation and approval of the manuscript.

## Competing interests

The experimental agents (dexmedetomidine hydrochloride and normal saline) are manufactured, packed and provided by the Jiangsu Nhwa Pharmaceutical Co., Ltd (Jiangsu, China). Agents provider has no role in the study design and conduct; the data collection, management, analysis and interpretation; or the preparation and approval of the manuscript.

The authors declare that they have no other competing interests.

## Patient consent

Obtained.

## Ethics approval

The study protocol (V2.0/2019-10-10 issue date October 2019) was approved by the Institutional Review Board of Beijing Tiantan Hospital Affiliated to Capital Medical

1  
2  
3  
4 University (No KY2019-091-02). The trial was registered at ClinicalTrials.gov with  
5  
6 identifier NCT04399343 on May 21, 2020.  
7  
8  
9  
10  
11  
12  
13  
14  
15  
16  
17  
18  
19  
20  
21  
22  
23  
24  
25  
26  
27  
28  
29  
30  
31  
32  
33  
34  
35  
36  
37  
38  
39  
40  
41  
42  
43  
44  
45  
46  
47  
48  
49  
50  
51  
52  
53  
54  
55  
56  
57  
58  
59  
60

For peer review only

1  
2  
3  
4  
5  
6  
7  
8  
9  
10  
11  
12  
13  
14  
15  
16  
17  
18  
19  
20  
21  
22  
23  
24  
25  
26  
27  
28  
29  
30  
31  
32  
33  
34  
35  
36  
37  
38  
39  
40  
41  
42  
43  
44  
45  
46  
47  
48  
49  
50  
51  
52  
53  
54  
55  
56  
57  
58  
59  
60

**Figure legend**

Figure 1 Flow chart of the trial

For peer review only

**Table 1. Data collection at each time point**

|                               | At study entry | Postoperative day 1 to 5,<br>twice daily | Postoperative day 7, 14, 21 and 28,<br>once daily |
|-------------------------------|----------------|------------------------------------------|---------------------------------------------------|
| Demographic data              | √              |                                          |                                                   |
| Data of history and diagnosis | √              |                                          |                                                   |
| Intraoperative data           | √              |                                          |                                                   |
| Data on ICU admission         | √              |                                          |                                                   |
| Data during ICU stay          |                | √, if not discharged from ICU            |                                                   |
| Delirium assessment           | √              | √                                        |                                                   |

1  
2  
3  
4  
5  
6  
7  
8  
9  
10  
11  
12  
13  
14  
15  
16  
17  
18  
19  
20  
21  
22  
23  
24  
25  
26  
27  
28  
29  
30  
31  
32  
33  
34  
35  
36  
37  
38  
39  
40  
41  
42  
43  
44  
45  
46

|                            |  |                                    |                                    |
|----------------------------|--|------------------------------------|------------------------------------|
| Study drug interruption    |  | √                                  |                                    |
| Adverse events             |  | √, if not discharged from ICU      |                                    |
| Non-delirium complications |  | √                                  | √, if not discharged from hospital |
| Length of stay in ICU      |  | √, if not discharged from ICU      | √, if not discharged from ICU      |
| Length of stay in hospital |  | √, if not discharged from hospital | √, if not discharged from hospital |
| All-cause death            |  | √                                  | √, if not discharged from hospital |

ICU: intensive care unit

For peer review only



Figure 1 Flow chart of the trial

238x186mm (300 x 300 DPI)



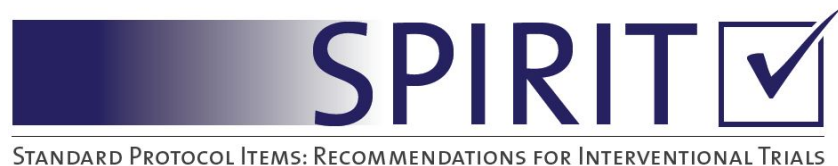

SPIRIT 2013 Checklist: Recommended items to address in a clinical trial protocol and related documents\*

| Mark | Section/item                      | Item No | Description                                                                                                                                                                                                                                                                              | Addressed on page number |
|------|-----------------------------------|---------|------------------------------------------------------------------------------------------------------------------------------------------------------------------------------------------------------------------------------------------------------------------------------------------|--------------------------|
|      | <b>Administrative information</b> |         |                                                                                                                                                                                                                                                                                          |                          |
| ✓    | Title                             | 1       | Descriptive title identifying the study design, population, interventions, and, if applicable, trial acronym                                                                                                                                                                             | 1                        |
| ✓    | Trial registration                | 2a      | Trial identifier and registry name. If not yet registered, name of intended registry                                                                                                                                                                                                     | 4                        |
|      |                                   | 2b      | All items from the World Health Organization Trial Registration Data Set                                                                                                                                                                                                                 | /                        |
| ✓    | Protocol version                  | 3       | Date and version identifier                                                                                                                                                                                                                                                              | 28                       |
| ✓    | Funding                           | 4       | Sources and types of financial, material, and other support                                                                                                                                                                                                                              | 28                       |
| ✓    | Roles and responsibilities        | 5a      | Names, affiliations, and roles of protocol contributors                                                                                                                                                                                                                                  | 1                        |
|      |                                   | 5b      | Name and contact information for the trial sponsor                                                                                                                                                                                                                                       | 1                        |
|      |                                   | 5c      | Role of study sponsor and funders, if any, in study design; collection, management, analysis, and interpretation of data; writing of the report; and the decision to submit the report for publication, including whether they will have ultimate authority over any of these activities | 28                       |
|      |                                   | 5d      | Composition, roles, and responsibilities of the coordinating centre, steering committee, endpoint adjudication committee, data management team, and other individuals or groups overseeing the trial, if applicable (see Item 21a for data monitoring committee)                         | 17&19                    |

|    |                                                           |                          |                                                                                                                                                                                                                                                                                                                                                                                   |                 |
|----|-----------------------------------------------------------|--------------------------|-----------------------------------------------------------------------------------------------------------------------------------------------------------------------------------------------------------------------------------------------------------------------------------------------------------------------------------------------------------------------------------|-----------------|
| 1  | <b>Introduction</b>                                       |                          |                                                                                                                                                                                                                                                                                                                                                                                   |                 |
| 2  |                                                           |                          |                                                                                                                                                                                                                                                                                                                                                                                   |                 |
| 3  | √                                                         | Background and rationale | 6a Description of research question and justification for undertaking the trial, including summary of relevant studies (published and unpublished) examining benefits and harms for each intervention                                                                                                                                                                             | 6-7             |
| 4  |                                                           |                          |                                                                                                                                                                                                                                                                                                                                                                                   |                 |
| 5  |                                                           |                          |                                                                                                                                                                                                                                                                                                                                                                                   |                 |
| 6  |                                                           |                          | 6b Explanation for choice of comparators                                                                                                                                                                                                                                                                                                                                          | 7               |
| 7  |                                                           |                          |                                                                                                                                                                                                                                                                                                                                                                                   |                 |
| 8  | √                                                         | Objectives               | 7 Specific objectives or hypotheses                                                                                                                                                                                                                                                                                                                                               | 7               |
| 9  |                                                           |                          |                                                                                                                                                                                                                                                                                                                                                                                   |                 |
| 10 | √                                                         | Trial design             | 8 Description of trial design including type of trial (eg, parallel group, crossover, factorial, single group), allocation ratio, and framework (eg, superiority, equivalence, noninferiority, exploratory)                                                                                                                                                                       | 8               |
| 11 |                                                           |                          |                                                                                                                                                                                                                                                                                                                                                                                   |                 |
| 12 |                                                           |                          |                                                                                                                                                                                                                                                                                                                                                                                   |                 |
| 13 |                                                           |                          |                                                                                                                                                                                                                                                                                                                                                                                   |                 |
| 14 | <b>Methods: Participants, interventions, and outcomes</b> |                          |                                                                                                                                                                                                                                                                                                                                                                                   |                 |
| 15 |                                                           |                          |                                                                                                                                                                                                                                                                                                                                                                                   |                 |
| 16 | √                                                         | Study setting            | 9 Description of study settings (eg, community clinic, academic hospital) and list of countries where data will be collected. Reference to where list of study sites can be obtained                                                                                                                                                                                              | 8               |
| 17 |                                                           |                          |                                                                                                                                                                                                                                                                                                                                                                                   |                 |
| 18 |                                                           |                          |                                                                                                                                                                                                                                                                                                                                                                                   |                 |
| 19 | √                                                         | Eligibility criteria     | 10 Inclusion and exclusion criteria for participants. If applicable, eligibility criteria for study centres and individuals who will perform the interventions (eg, surgeons, psychotherapists)                                                                                                                                                                                   | 9-10            |
| 20 |                                                           |                          |                                                                                                                                                                                                                                                                                                                                                                                   |                 |
| 21 |                                                           |                          |                                                                                                                                                                                                                                                                                                                                                                                   |                 |
| 22 | √                                                         | Interventions            | 11a Interventions for each group with sufficient detail to allow replication, including how and when they will be administered                                                                                                                                                                                                                                                    | 12-13           |
| 23 |                                                           |                          |                                                                                                                                                                                                                                                                                                                                                                                   |                 |
| 24 |                                                           |                          |                                                                                                                                                                                                                                                                                                                                                                                   |                 |
| 25 |                                                           |                          |                                                                                                                                                                                                                                                                                                                                                                                   |                 |
| 26 |                                                           |                          | 11b Criteria for discontinuing or modifying allocated interventions for a given trial participant (eg, drug dose change in response to harms, participant request, or improving/worsening disease)                                                                                                                                                                                | 11              |
| 27 |                                                           |                          |                                                                                                                                                                                                                                                                                                                                                                                   |                 |
| 28 |                                                           |                          |                                                                                                                                                                                                                                                                                                                                                                                   |                 |
| 29 |                                                           |                          | 11c Strategies to improve adherence to intervention protocols, and any procedures for monitoring adherence (eg, drug tablet return, laboratory tests)                                                                                                                                                                                                                             | 11-12           |
| 30 |                                                           |                          |                                                                                                                                                                                                                                                                                                                                                                                   |                 |
| 31 |                                                           |                          |                                                                                                                                                                                                                                                                                                                                                                                   |                 |
| 32 |                                                           |                          | 11d Relevant concomitant care and interventions that are permitted or prohibited during the trial                                                                                                                                                                                                                                                                                 | 13-14           |
| 33 |                                                           |                          |                                                                                                                                                                                                                                                                                                                                                                                   |                 |
| 34 | √                                                         | Outcomes                 | 12 Primary, secondary, and other outcomes, including the specific measurement variable (eg, systolic blood pressure), analysis metric (eg, change from baseline, final value, time to event), method of aggregation (eg, median, proportion), and time point for each outcome. Explanation of the clinical relevance of chosen efficacy and harm outcomes is strongly recommended | 15-16           |
| 35 |                                                           |                          |                                                                                                                                                                                                                                                                                                                                                                                   |                 |
| 36 |                                                           |                          |                                                                                                                                                                                                                                                                                                                                                                                   |                 |
| 37 |                                                           |                          |                                                                                                                                                                                                                                                                                                                                                                                   |                 |
| 38 |                                                           |                          |                                                                                                                                                                                                                                                                                                                                                                                   |                 |
| 39 |                                                           |                          |                                                                                                                                                                                                                                                                                                                                                                                   |                 |
| 40 | √                                                         | Participant timeline     | 13 Time schedule of enrolment, interventions (including any run-ins and washouts), assessments, and visits for participants. A schematic diagram is highly recommended (see Figure)                                                                                                                                                                                               | Figure1&Table 1 |
| 41 |                                                           |                          |                                                                                                                                                                                                                                                                                                                                                                                   |                 |
| 42 |                                                           |                          |                                                                                                                                                                                                                                                                                                                                                                                   |                 |
| 43 |                                                           |                          |                                                                                                                                                                                                                                                                                                                                                                                   |                 |
| 44 |                                                           |                          |                                                                                                                                                                                                                                                                                                                                                                                   |                 |
| 45 |                                                           |                          |                                                                                                                                                                                                                                                                                                                                                                                   |                 |
| 46 |                                                           |                          |                                                                                                                                                                                                                                                                                                                                                                                   |                 |

|   |   |             |    |                                                                                                                                                                                       |       |
|---|---|-------------|----|---------------------------------------------------------------------------------------------------------------------------------------------------------------------------------------|-------|
| 1 | √ | Sample size | 14 | Estimated number of participants needed to achieve study objectives and how it was determined, including clinical and statistical assumptions supporting any sample size calculations | 17-18 |
| 2 |   |             |    |                                                                                                                                                                                       |       |
| 3 |   |             |    |                                                                                                                                                                                       |       |
| 4 | √ | Recruitment | 15 | Strategies for achieving adequate participant enrolment to reach target sample size                                                                                                   | 17-18 |
| 5 |   |             |    |                                                                                                                                                                                       |       |

6 **Methods: Assignment of interventions (for controlled trials)**

|    |   |                                  |     |                                                                                                                                                                                                                                                                                                                                                          |       |
|----|---|----------------------------------|-----|----------------------------------------------------------------------------------------------------------------------------------------------------------------------------------------------------------------------------------------------------------------------------------------------------------------------------------------------------------|-------|
| 8  | √ | Allocation:                      |     |                                                                                                                                                                                                                                                                                                                                                          |       |
| 9  |   |                                  |     |                                                                                                                                                                                                                                                                                                                                                          |       |
| 10 |   | Sequence generation              | 16a | Method of generating the allocation sequence (eg, computer-generated random numbers), and list of any factors for stratification. To reduce predictability of a random sequence, details of any planned restriction (eg, blocking) should be provided in a separate document that is unavailable to those who enrol participants or assign interventions | 10    |
| 11 |   |                                  |     |                                                                                                                                                                                                                                                                                                                                                          |       |
| 12 |   |                                  |     |                                                                                                                                                                                                                                                                                                                                                          |       |
| 13 |   |                                  |     |                                                                                                                                                                                                                                                                                                                                                          |       |
| 14 |   |                                  |     |                                                                                                                                                                                                                                                                                                                                                          |       |
| 15 |   |                                  |     |                                                                                                                                                                                                                                                                                                                                                          |       |
| 16 |   | Allocation concealment mechanism | 16b | Mechanism of implementing the allocation sequence (eg, central telephone; sequentially numbered, opaque, sealed envelopes), describing any steps to conceal the sequence until interventions are assigned                                                                                                                                                | 10-11 |
| 17 |   |                                  |     |                                                                                                                                                                                                                                                                                                                                                          |       |
| 18 |   |                                  |     |                                                                                                                                                                                                                                                                                                                                                          |       |
| 19 |   |                                  |     |                                                                                                                                                                                                                                                                                                                                                          |       |
| 20 |   | Implementation                   | 16c | Who will generate the allocation sequence, who will enrol participants, and who will assign participants to interventions                                                                                                                                                                                                                                | 10-11 |
| 21 |   |                                  |     |                                                                                                                                                                                                                                                                                                                                                          |       |
| 22 |   |                                  |     |                                                                                                                                                                                                                                                                                                                                                          |       |
| 23 |   |                                  |     |                                                                                                                                                                                                                                                                                                                                                          |       |
| 24 | √ | Blinding (masking)               | 17a | Who will be blinded after assignment to interventions (eg, trial participants, care providers, outcome assessors, data analysts), and how                                                                                                                                                                                                                | 11    |
| 25 |   |                                  |     |                                                                                                                                                                                                                                                                                                                                                          |       |
| 26 |   |                                  |     |                                                                                                                                                                                                                                                                                                                                                          |       |
| 27 |   |                                  | 17b | If blinded, circumstances under which unblinding is permissible, and procedure for revealing a participant's allocated intervention during the trial                                                                                                                                                                                                     | 11    |
| 28 |   |                                  |     |                                                                                                                                                                                                                                                                                                                                                          |       |
| 29 |   |                                  |     |                                                                                                                                                                                                                                                                                                                                                          |       |
| 30 |   |                                  |     |                                                                                                                                                                                                                                                                                                                                                          |       |

31 **Methods: Data collection, management, and analysis**

|    |   |                         |     |                                                                                                                                                                                                                                                                                                                                                                                                              |       |
|----|---|-------------------------|-----|--------------------------------------------------------------------------------------------------------------------------------------------------------------------------------------------------------------------------------------------------------------------------------------------------------------------------------------------------------------------------------------------------------------|-------|
| 32 |   |                         |     |                                                                                                                                                                                                                                                                                                                                                                                                              |       |
| 33 | √ | Data collection methods | 18a | Plans for assessment and collection of outcome, baseline, and other trial data, including any related processes to promote data quality (eg, duplicate measurements, training of assessors) and a description of study instruments (eg, questionnaires, laboratory tests) along with their reliability and validity, if known. Reference to where data collection forms can be found, if not in the protocol | 15-16 |
| 34 |   |                         |     |                                                                                                                                                                                                                                                                                                                                                                                                              |       |
| 35 |   |                         |     |                                                                                                                                                                                                                                                                                                                                                                                                              |       |
| 36 |   |                         |     |                                                                                                                                                                                                                                                                                                                                                                                                              |       |
| 37 |   |                         |     |                                                                                                                                                                                                                                                                                                                                                                                                              |       |
| 38 |   |                         |     |                                                                                                                                                                                                                                                                                                                                                                                                              |       |
| 39 |   |                         | 18b | Plans to promote participant retention and complete follow-up, including list of any outcome data to be collected for participants who discontinue or deviate from intervention protocols                                                                                                                                                                                                                    | 15    |
| 40 |   |                         |     |                                                                                                                                                                                                                                                                                                                                                                                                              |       |
| 41 |   |                         |     |                                                                                                                                                                                                                                                                                                                                                                                                              |       |
| 42 |   |                         |     |                                                                                                                                                                                                                                                                                                                                                                                                              |       |

|    |   |                                 |     |                                                                                                                                                                                                                                                                                                                                       |          |
|----|---|---------------------------------|-----|---------------------------------------------------------------------------------------------------------------------------------------------------------------------------------------------------------------------------------------------------------------------------------------------------------------------------------------|----------|
| 1  | √ | Data management                 | 19  | Plans for data entry, coding, security, and storage, including any related processes to promote data quality (eg, double data entry; range checks for data values). Reference to where details of data management procedures can be found, if not in the protocol                                                                     | 16-17    |
| 2  |   |                                 |     |                                                                                                                                                                                                                                                                                                                                       |          |
| 3  |   |                                 |     |                                                                                                                                                                                                                                                                                                                                       |          |
| 4  |   |                                 |     |                                                                                                                                                                                                                                                                                                                                       |          |
| 5  | √ | Statistical methods             | 20a | Statistical methods for analysing primary and secondary outcomes. Reference to where other details of the statistical analysis plan can be found, if not in the protocol                                                                                                                                                              | 18       |
| 6  |   |                                 |     |                                                                                                                                                                                                                                                                                                                                       |          |
| 7  |   |                                 |     |                                                                                                                                                                                                                                                                                                                                       |          |
| 8  |   |                                 | 20b | Methods for any additional analyses (eg, subgroup and adjusted analyses)                                                                                                                                                                                                                                                              | 18       |
| 9  |   |                                 |     |                                                                                                                                                                                                                                                                                                                                       |          |
| 10 |   |                                 | 20c | Definition of analysis population relating to protocol non-adherence (eg, as randomised analysis), and any statistical methods to handle missing data (eg, multiple imputation)                                                                                                                                                       | 15       |
| 11 |   |                                 |     |                                                                                                                                                                                                                                                                                                                                       |          |
| 12 |   |                                 |     |                                                                                                                                                                                                                                                                                                                                       |          |
| 13 |   |                                 |     |                                                                                                                                                                                                                                                                                                                                       |          |
| 14 |   | <b>Methods: Monitoring</b>      |     |                                                                                                                                                                                                                                                                                                                                       |          |
| 15 |   |                                 |     |                                                                                                                                                                                                                                                                                                                                       |          |
| 16 | √ | Data monitoring                 | 21a | Composition of data monitoring committee (DMC); summary of its role and reporting structure; statement of whether it is independent from the sponsor and competing interests; and reference to where further details about its charter can be found, if not in the protocol. Alternatively, an explanation of why a DMC is not needed | 17       |
| 17 |   |                                 |     |                                                                                                                                                                                                                                                                                                                                       |          |
| 18 |   |                                 |     |                                                                                                                                                                                                                                                                                                                                       |          |
| 19 |   |                                 |     |                                                                                                                                                                                                                                                                                                                                       |          |
| 20 |   |                                 |     |                                                                                                                                                                                                                                                                                                                                       |          |
| 21 |   |                                 |     |                                                                                                                                                                                                                                                                                                                                       |          |
| 22 |   |                                 | 21b | Description of any interim analyses and stopping guidelines, including who will have access to these interim results and make the final decision to terminate the trial                                                                                                                                                               | 19       |
| 23 |   |                                 |     |                                                                                                                                                                                                                                                                                                                                       |          |
| 24 |   |                                 |     |                                                                                                                                                                                                                                                                                                                                       |          |
| 25 | √ | Harms                           | 22  | Plans for collecting, assessing, reporting, and managing solicited and spontaneously reported adverse events and other unintended effects of trial interventions or trial conduct                                                                                                                                                     | 14-15&19 |
| 26 |   |                                 |     |                                                                                                                                                                                                                                                                                                                                       |          |
| 27 |   |                                 |     |                                                                                                                                                                                                                                                                                                                                       |          |
| 28 | √ | Auditing                        | 23  | Frequency and procedures for auditing trial conduct, if any, and whether the process will be independent from investigators and the sponsor                                                                                                                                                                                           | 19       |
| 29 |   |                                 |     |                                                                                                                                                                                                                                                                                                                                       |          |
| 30 |   |                                 |     |                                                                                                                                                                                                                                                                                                                                       |          |
| 31 |   |                                 |     |                                                                                                                                                                                                                                                                                                                                       |          |
| 32 |   | <b>Ethics and dissemination</b> |     |                                                                                                                                                                                                                                                                                                                                       |          |
| 33 |   |                                 |     |                                                                                                                                                                                                                                                                                                                                       |          |
| 34 | √ | Research ethics approval        | 24  | Plans for seeking research ethics committee/institutional review board (REC/IRB) approval                                                                                                                                                                                                                                             | 18-19    |
| 35 |   |                                 |     |                                                                                                                                                                                                                                                                                                                                       |          |
| 36 |   |                                 |     |                                                                                                                                                                                                                                                                                                                                       |          |
| 37 | √ | Protocol amendments             | 25  | Plans for communicating important protocol modifications (eg, changes to eligibility criteria, outcomes, analyses) to relevant parties (eg, investigators, REC/IRBs, trial participants, trial registries, journals, regulators)                                                                                                      | 28-29    |
| 38 |   |                                 |     |                                                                                                                                                                                                                                                                                                                                       |          |
| 39 |   |                                 |     |                                                                                                                                                                                                                                                                                                                                       |          |
| 40 |   |                                 |     |                                                                                                                                                                                                                                                                                                                                       |          |
| 41 |   |                                 |     |                                                                                                                                                                                                                                                                                                                                       |          |
| 42 |   |                                 |     |                                                                                                                                                                                                                                                                                                                                       |          |
| 43 |   |                                 |     |                                                                                                                                                                                                                                                                                                                                       |          |
| 44 |   |                                 |     |                                                                                                                                                                                                                                                                                                                                       |          |
| 45 |   |                                 |     |                                                                                                                                                                                                                                                                                                                                       |          |
| 46 |   |                                 |     |                                                                                                                                                                                                                                                                                                                                       |          |

|    |   |                               |     |                                                                                                                                                                                                                                                                                     |                    |
|----|---|-------------------------------|-----|-------------------------------------------------------------------------------------------------------------------------------------------------------------------------------------------------------------------------------------------------------------------------------------|--------------------|
| 1  | √ | Consent or assent             | 26a | Who will obtain informed consent or assent from potential trial participants or authorised surrogates, and how (see Item 32)                                                                                                                                                        | 10                 |
| 2  |   |                               |     |                                                                                                                                                                                                                                                                                     |                    |
| 3  |   |                               |     |                                                                                                                                                                                                                                                                                     |                    |
| 4  |   |                               | 26b | Additional consent provisions for collection and use of participant data and biological specimens in ancillary studies, if applicable                                                                                                                                               | NA                 |
| 5  |   |                               |     |                                                                                                                                                                                                                                                                                     |                    |
| 6  |   |                               |     |                                                                                                                                                                                                                                                                                     |                    |
| 7  | √ | Confidentiality               | 27  | How personal information about potential and enrolled participants will be collected, shared, and maintained in order to protect confidentiality before, during, and after the trial                                                                                                | 16-17              |
| 8  |   |                               |     |                                                                                                                                                                                                                                                                                     |                    |
| 9  |   |                               |     |                                                                                                                                                                                                                                                                                     |                    |
| 10 | √ | Declaration of interests      | 28  | Financial and other competing interests for principal investigators for the overall trial and each study site                                                                                                                                                                       | 28                 |
| 11 |   |                               |     |                                                                                                                                                                                                                                                                                     |                    |
| 12 |   |                               |     |                                                                                                                                                                                                                                                                                     |                    |
| 13 | √ | Access to data                | 29  | Statement of who will have access to the final trial dataset, and disclosure of contractual agreements that limit such access for investigators                                                                                                                                     | 16-17              |
| 14 |   |                               |     |                                                                                                                                                                                                                                                                                     |                    |
| 15 |   |                               |     |                                                                                                                                                                                                                                                                                     |                    |
| 16 |   |                               |     |                                                                                                                                                                                                                                                                                     |                    |
| 17 | √ | Ancillary and post-trial care | 30  | Provisions, if any, for ancillary and post-trial care, and for compensation to those who suffer harm from trial participation                                                                                                                                                       | 14-15&17           |
| 18 |   |                               |     |                                                                                                                                                                                                                                                                                     |                    |
| 19 |   |                               |     |                                                                                                                                                                                                                                                                                     |                    |
| 20 | √ | Dissemination policy          | 31a | Plans for investigators and sponsor to communicate trial results to participants, healthcare professionals, the public, and other relevant groups (eg, via publication, reporting in results databases, or other data sharing arrangements), including any publication restrictions | 18-19              |
| 21 |   |                               |     |                                                                                                                                                                                                                                                                                     |                    |
| 22 |   |                               |     |                                                                                                                                                                                                                                                                                     |                    |
| 23 |   |                               |     |                                                                                                                                                                                                                                                                                     |                    |
| 24 |   |                               | 31b | Authorship eligibility guidelines and any intended use of professional writers                                                                                                                                                                                                      | 18-19              |
| 25 |   |                               |     |                                                                                                                                                                                                                                                                                     |                    |
| 26 |   |                               | 31c | Plans, if any, for granting public access to the full protocol, participant-level dataset, and statistical code                                                                                                                                                                     | NA                 |
| 27 |   |                               |     |                                                                                                                                                                                                                                                                                     |                    |
| 28 |   |                               |     |                                                                                                                                                                                                                                                                                     |                    |
| 29 |   |                               |     |                                                                                                                                                                                                                                                                                     |                    |
| 30 |   | <b>Appendices</b>             |     |                                                                                                                                                                                                                                                                                     |                    |
| 31 |   |                               |     |                                                                                                                                                                                                                                                                                     |                    |
| 32 | √ | Informed consent materials    | 32  | Model consent form and other related documentation given to participants and authorised surrogates                                                                                                                                                                                  | Supplementary file |
| 33 |   |                               |     |                                                                                                                                                                                                                                                                                     |                    |
| 34 |   |                               |     |                                                                                                                                                                                                                                                                                     |                    |
| 35 | / | Biological specimens          | 33  | Plans for collection, laboratory evaluation, and storage of biological specimens for genetic or molecular analysis in the current trial and for future use in ancillary studies, if applicable                                                                                      | NA                 |
| 36 |   |                               |     |                                                                                                                                                                                                                                                                                     |                    |
| 37 |   |                               |     |                                                                                                                                                                                                                                                                                     |                    |

\*It is strongly recommended that this checklist be read in conjunction with the SPIRIT 2013 Explanation & Elaboration for important clarification on the items. Amendments to the protocol should be tracked and dated. The SPIRIT checklist is copyrighted by the SPIRIT Group under the Creative Commons "[Attribution-NonCommercial-NoDerivs 3.0 Unported](https://creativecommons.org/licenses/by-nc-nd/3.0/)" license.
